# Supplementary material
Source: PubMed Central journal article supplement (PMC10029094)
Supplement: NIHMS1875492-supplement-Supplementary_Material.pdf [file NIHMS1875492-supplement-Supplementary_Material.pdf]

## Supporting Information

### Epidermal Growth Factor Receptor Targeted Multifunctional Photosensitizers for Bladder Cancer Imaging and Photodynamic Therapy

Ravindra R. Cheruku, Joseph Cacaccio, Farukh A. Durrani, Walter A. Tabaczynski, Ramona Watson, Aimee Marko, Rahul Kumar, Mohamed E. El-Khouly, Shunichi Fukuzumi, Joseph R. Missert, Rutao Yao, Munawwar Sajjad, Dhyan Chandra, Khurshid Guru and Ravindra K Pandey\*

#### Contents:

- **Figures S1- S14:**  $^1\text{H}$  &  $^{13}\text{C}$  NMR spectra of compounds **3**, **5**, **8-11** and **13** Page S2-15
- **Figure S15:** Variable temperature NMR spectra of compound **5** Page S16
- **Figures S16-20** Comparative photophysical properties of **1**, **3** and **5** Page S17- S21
- **Molecular Formula Strings** Page S22

Figure S1:  $^1\text{H-NMR}$  (400 MHz,  $\text{CDCl}_3$ )

S2

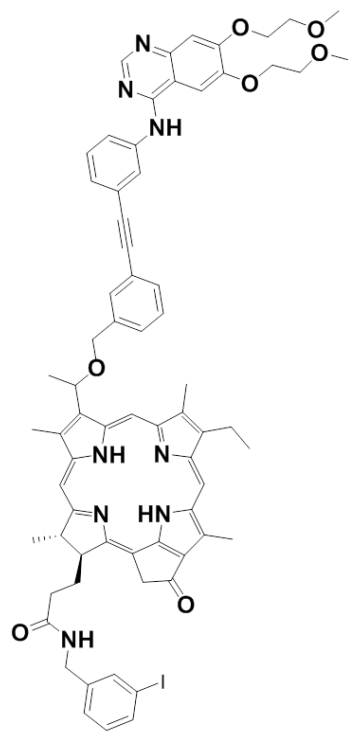

**3**

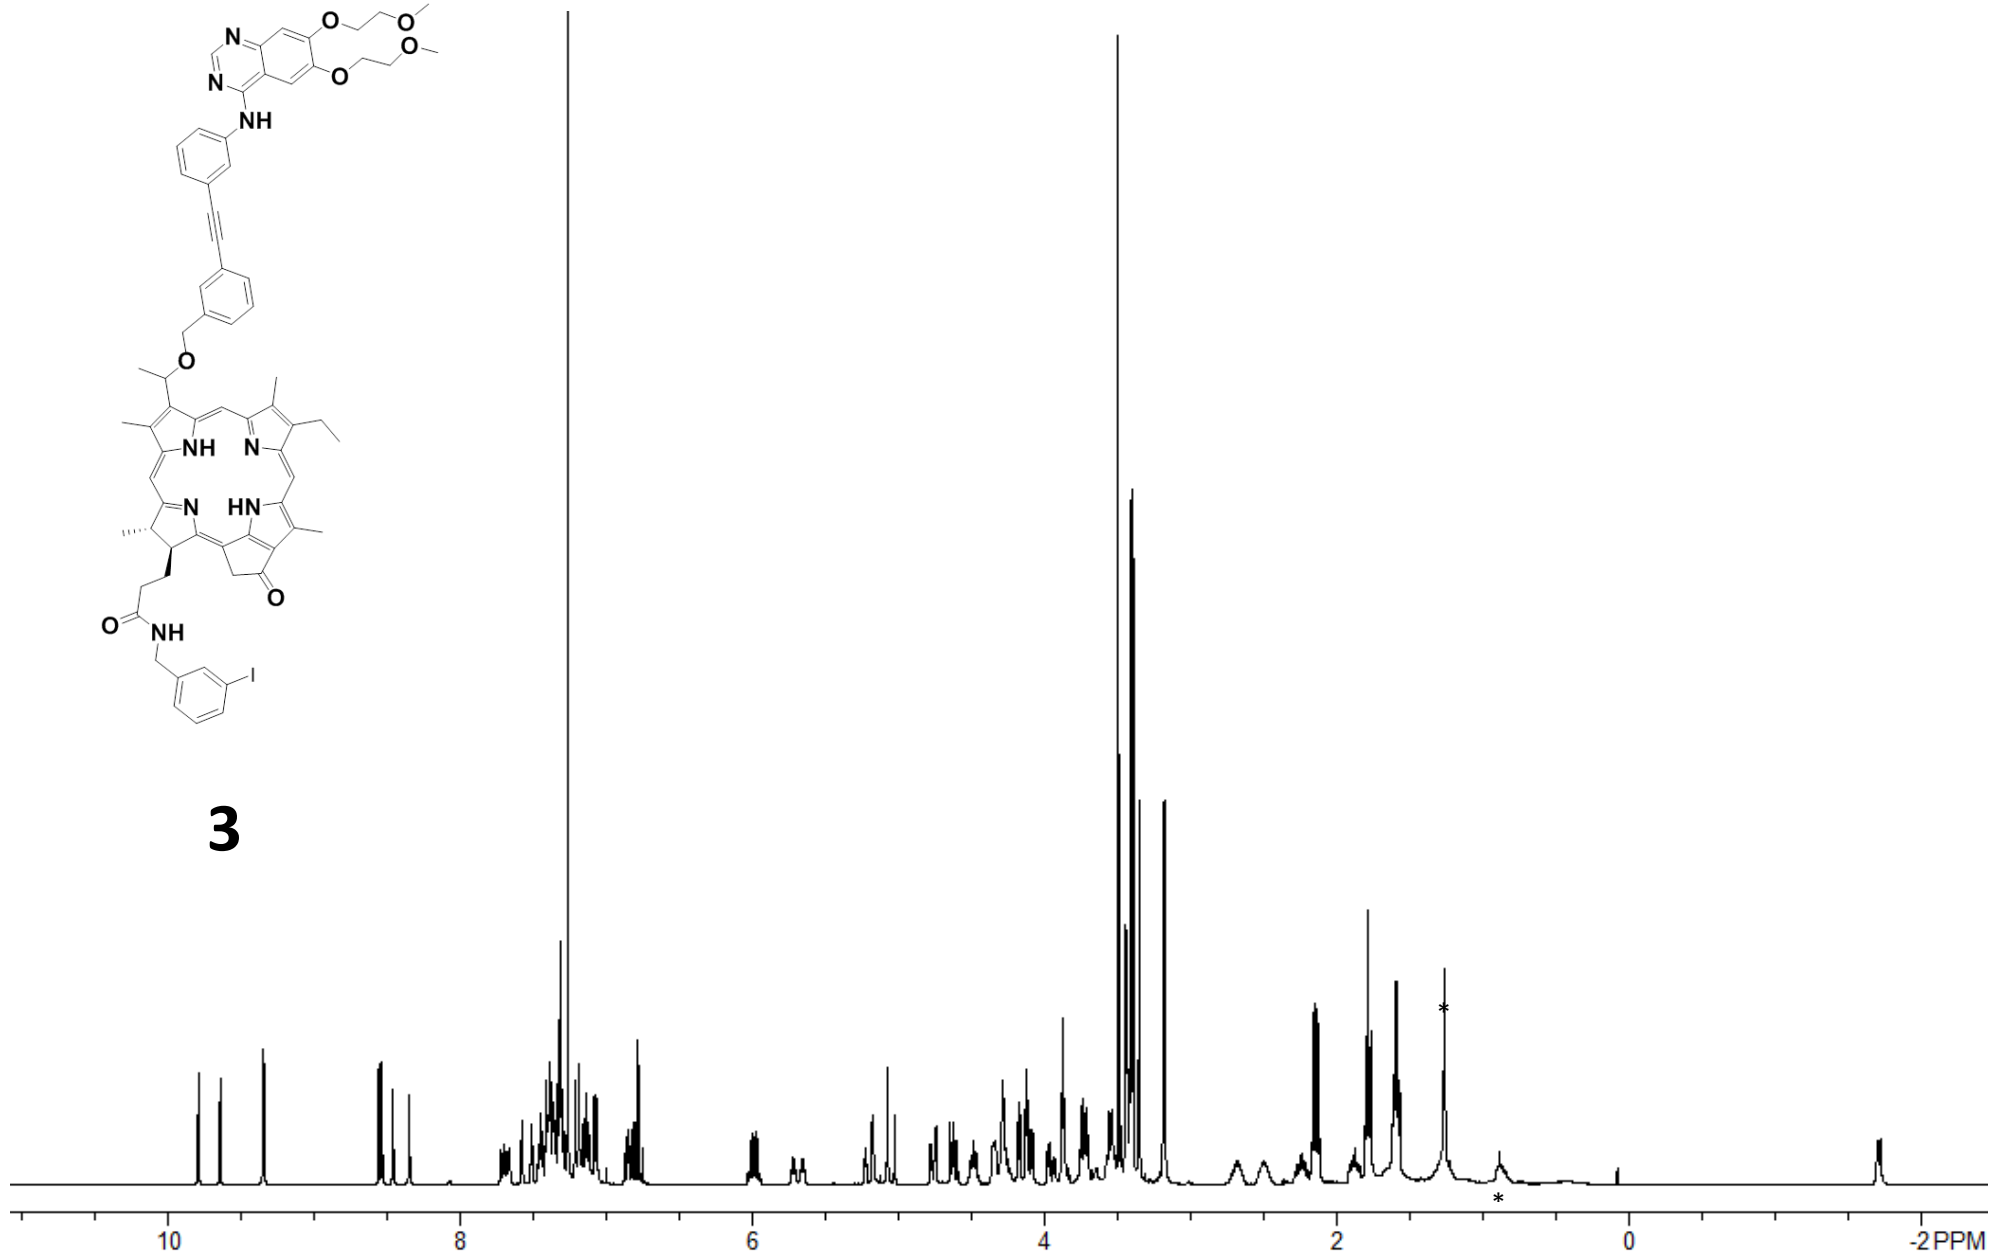

Figure S2:  $^{13}\text{C}$ -NMR (100 MHz,  $\text{CDCl}_3$ )

S3

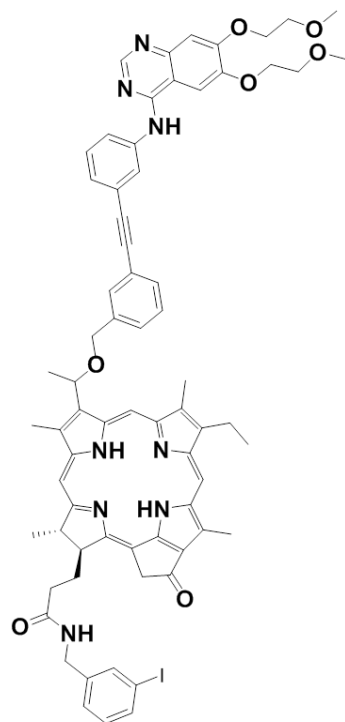

3

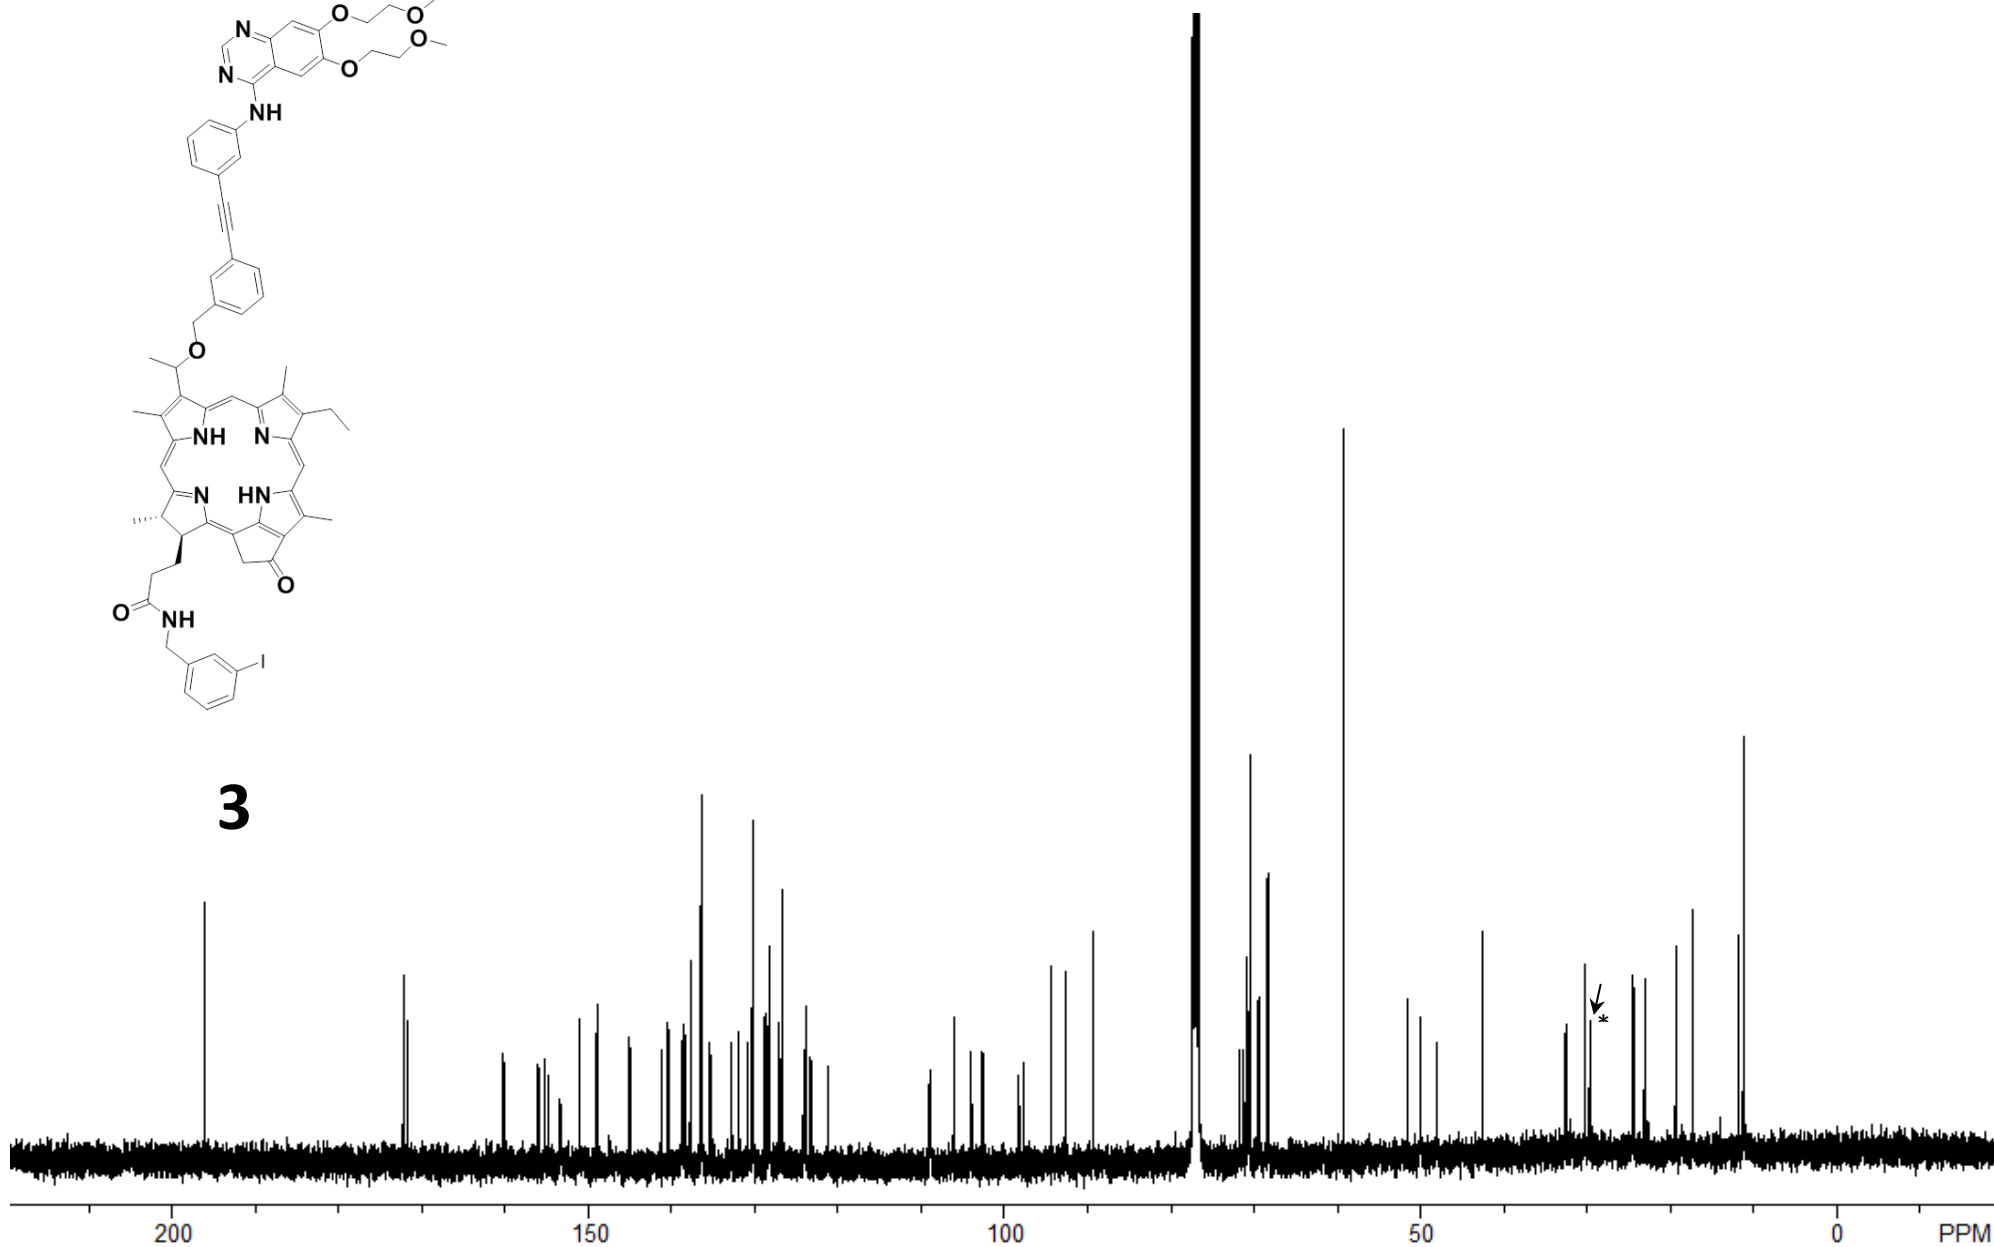

\* Grease impurity

Figure S3:  $^1\text{H-NMR}$  (400 MHz,  $\text{CDCl}_3$ )

S4

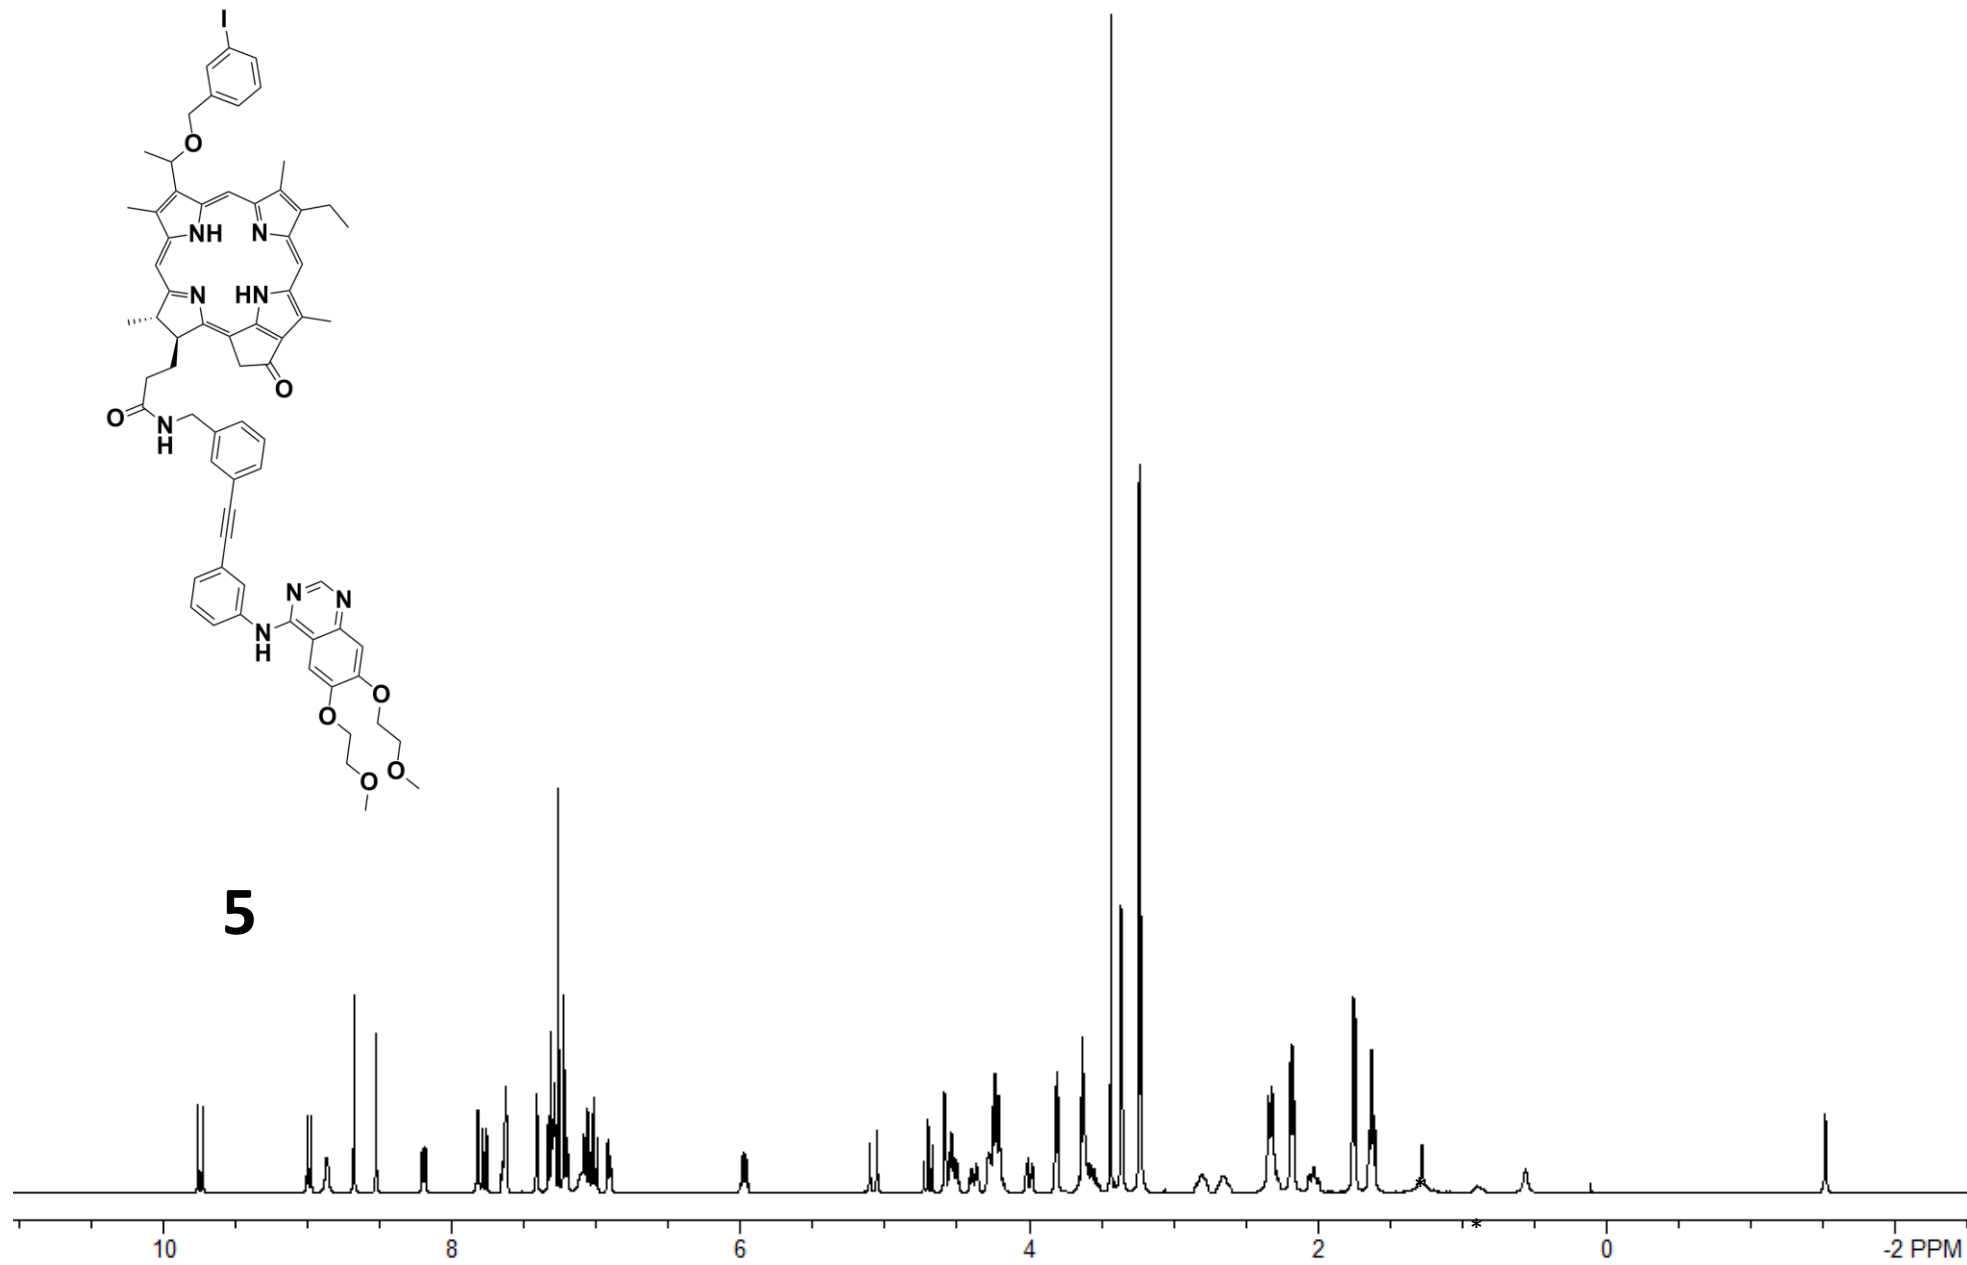

\* Grease impurity



Figure S5:  $^1\text{H-NMR}$  (400 MHz,  $\text{CDCl}_3$ )

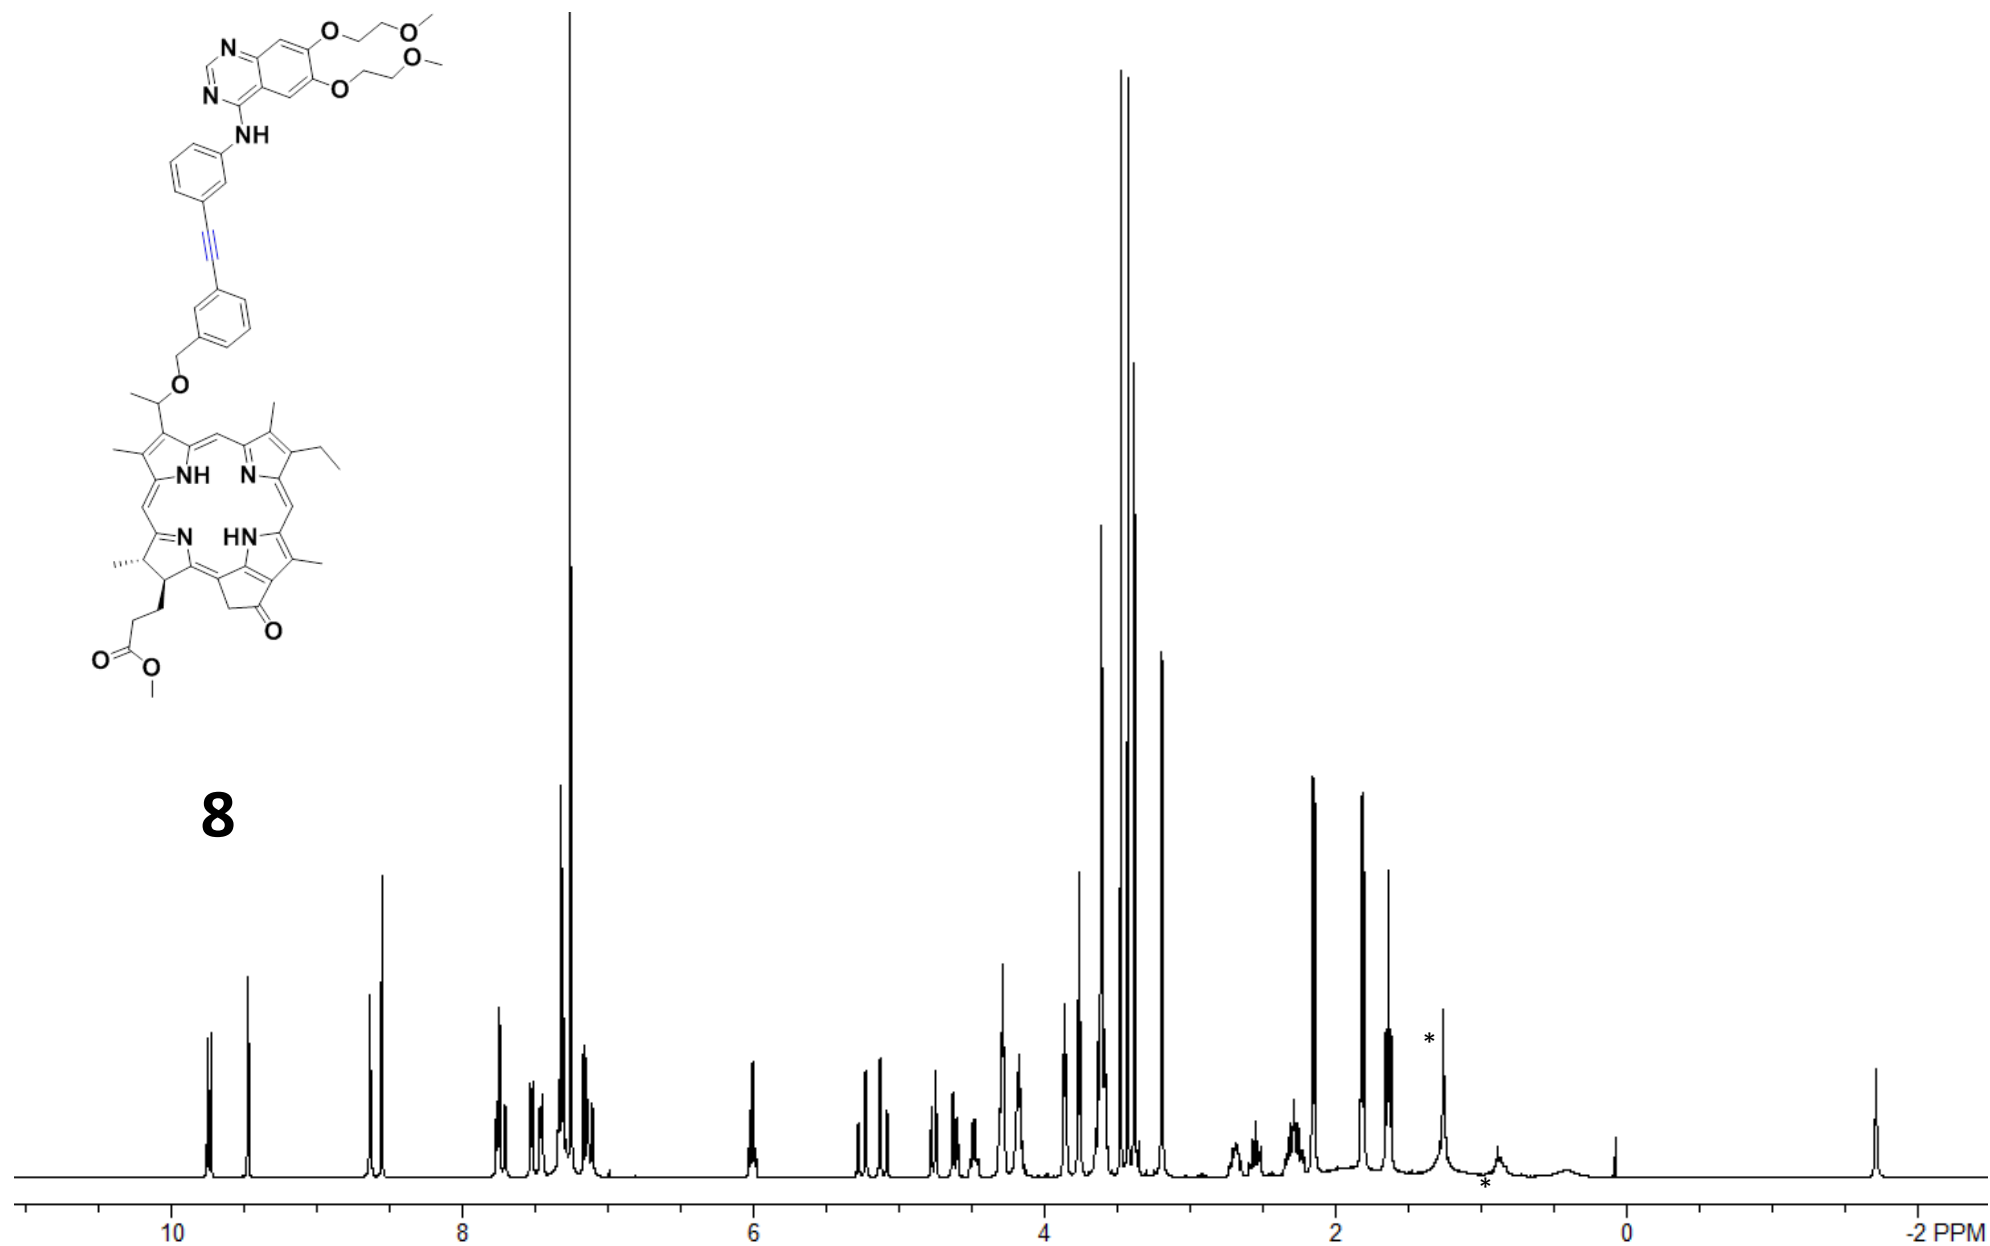

\* Grease impurity

Figure S6:  $^{13}\text{C}$ -NMR (100 MHz,  $\text{CDCl}_3$ )

S7

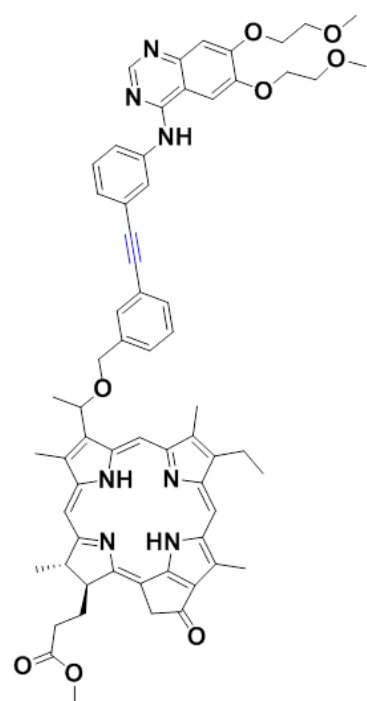

8

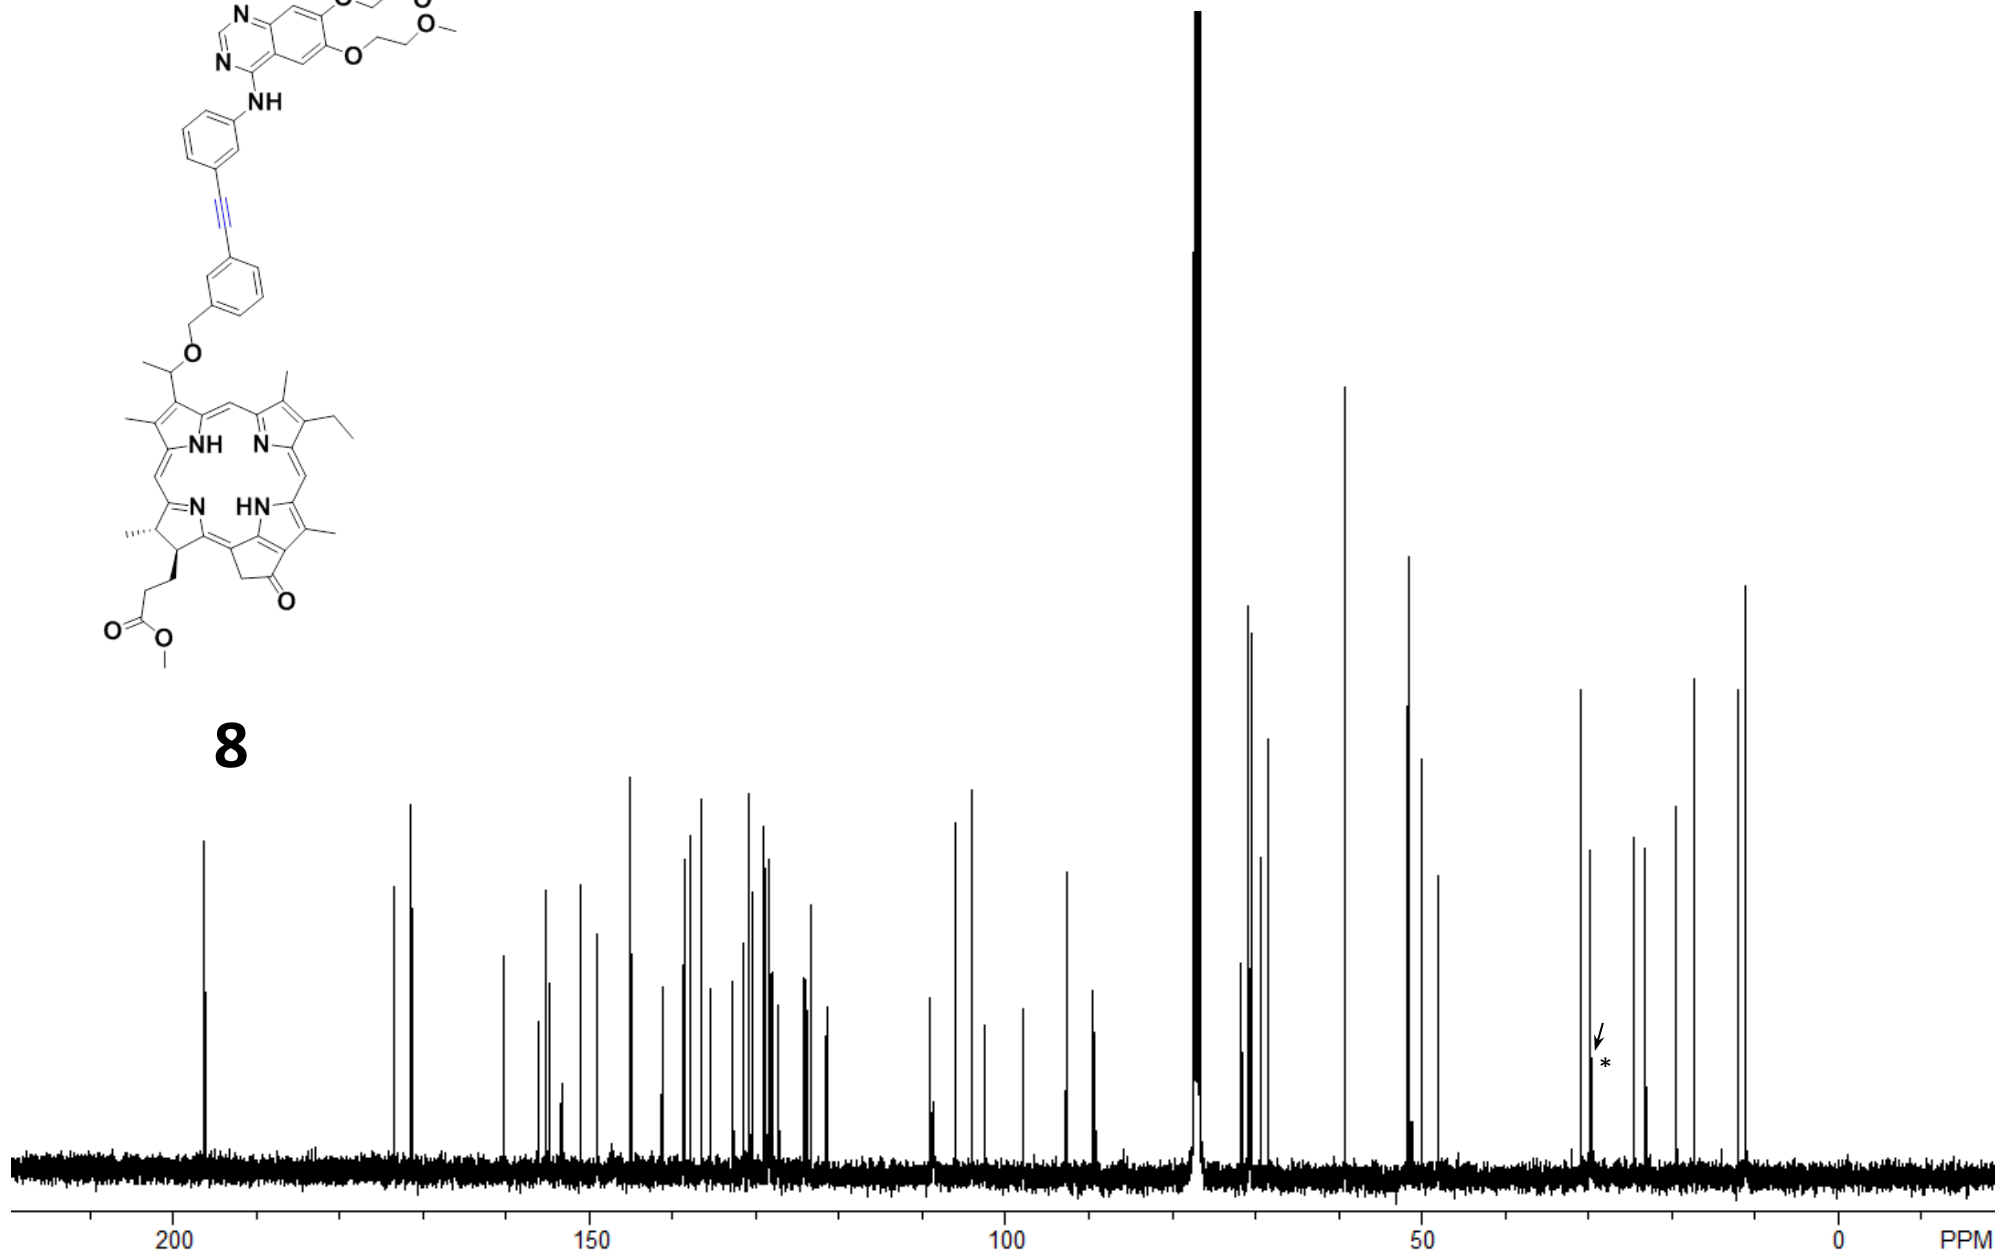

\* Grease impurity

Figure S7:  $^1\text{H-NMR}$  (400 MHz, 90:10  $\text{CDCl}_3/\text{CD}_3\text{OD}$ )

S8

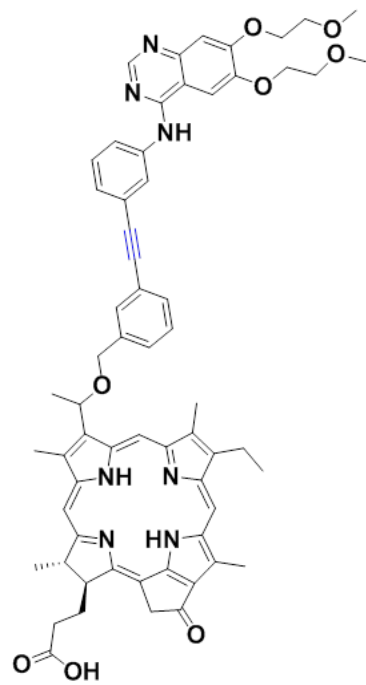

9

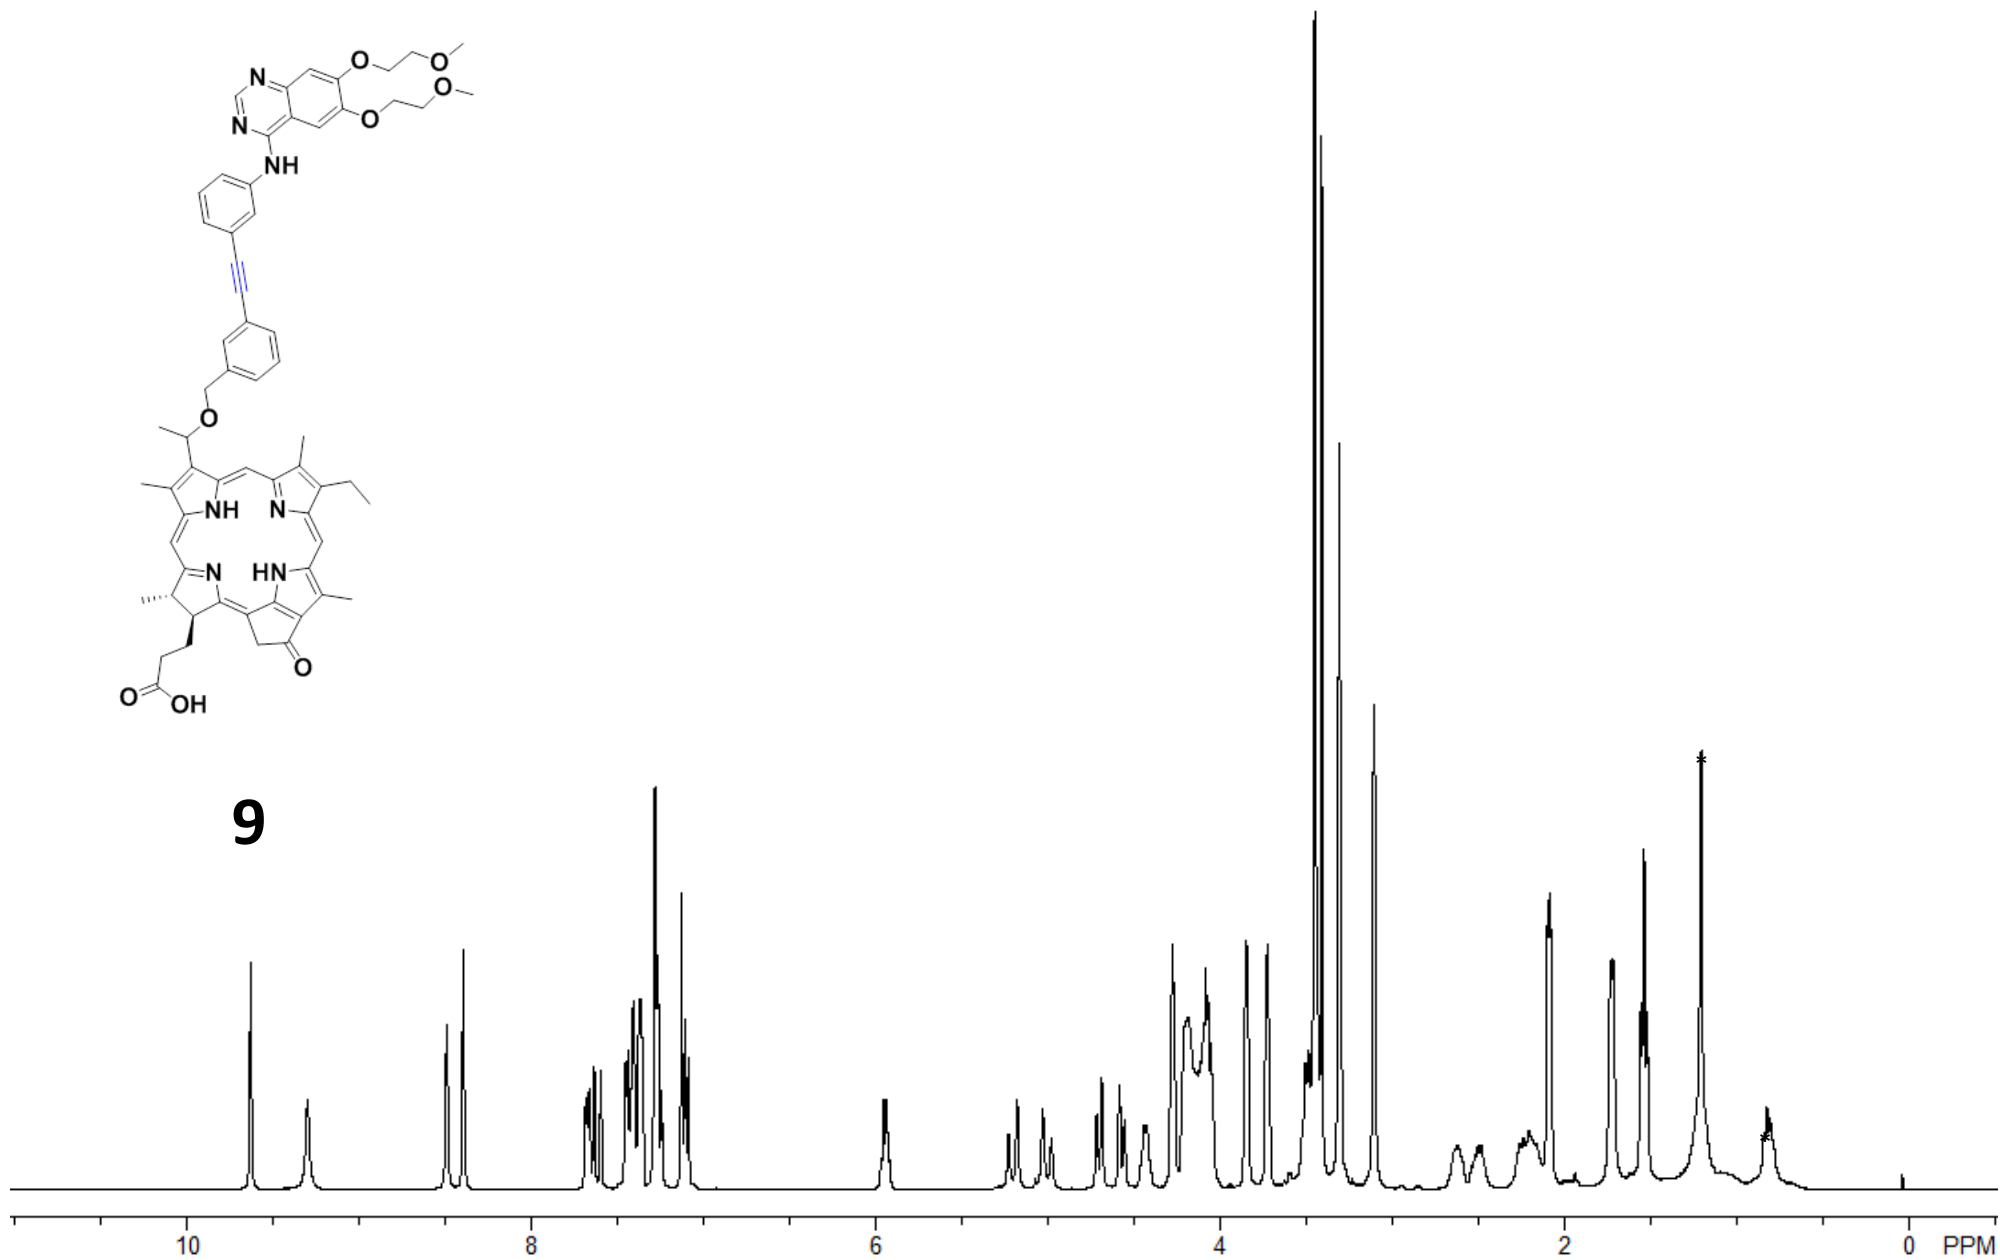

\* Grease impurity



Figure S8:  $^{13}\text{C}$ -NMR (100 MHz, 90:10  $\text{CDCl}_3/\text{CD}_3\text{OD}$ )

S9

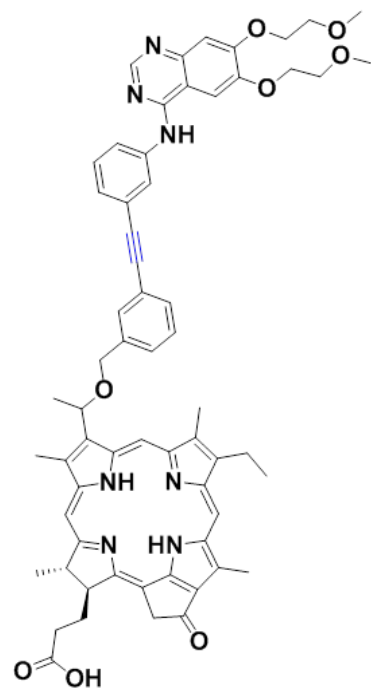

9

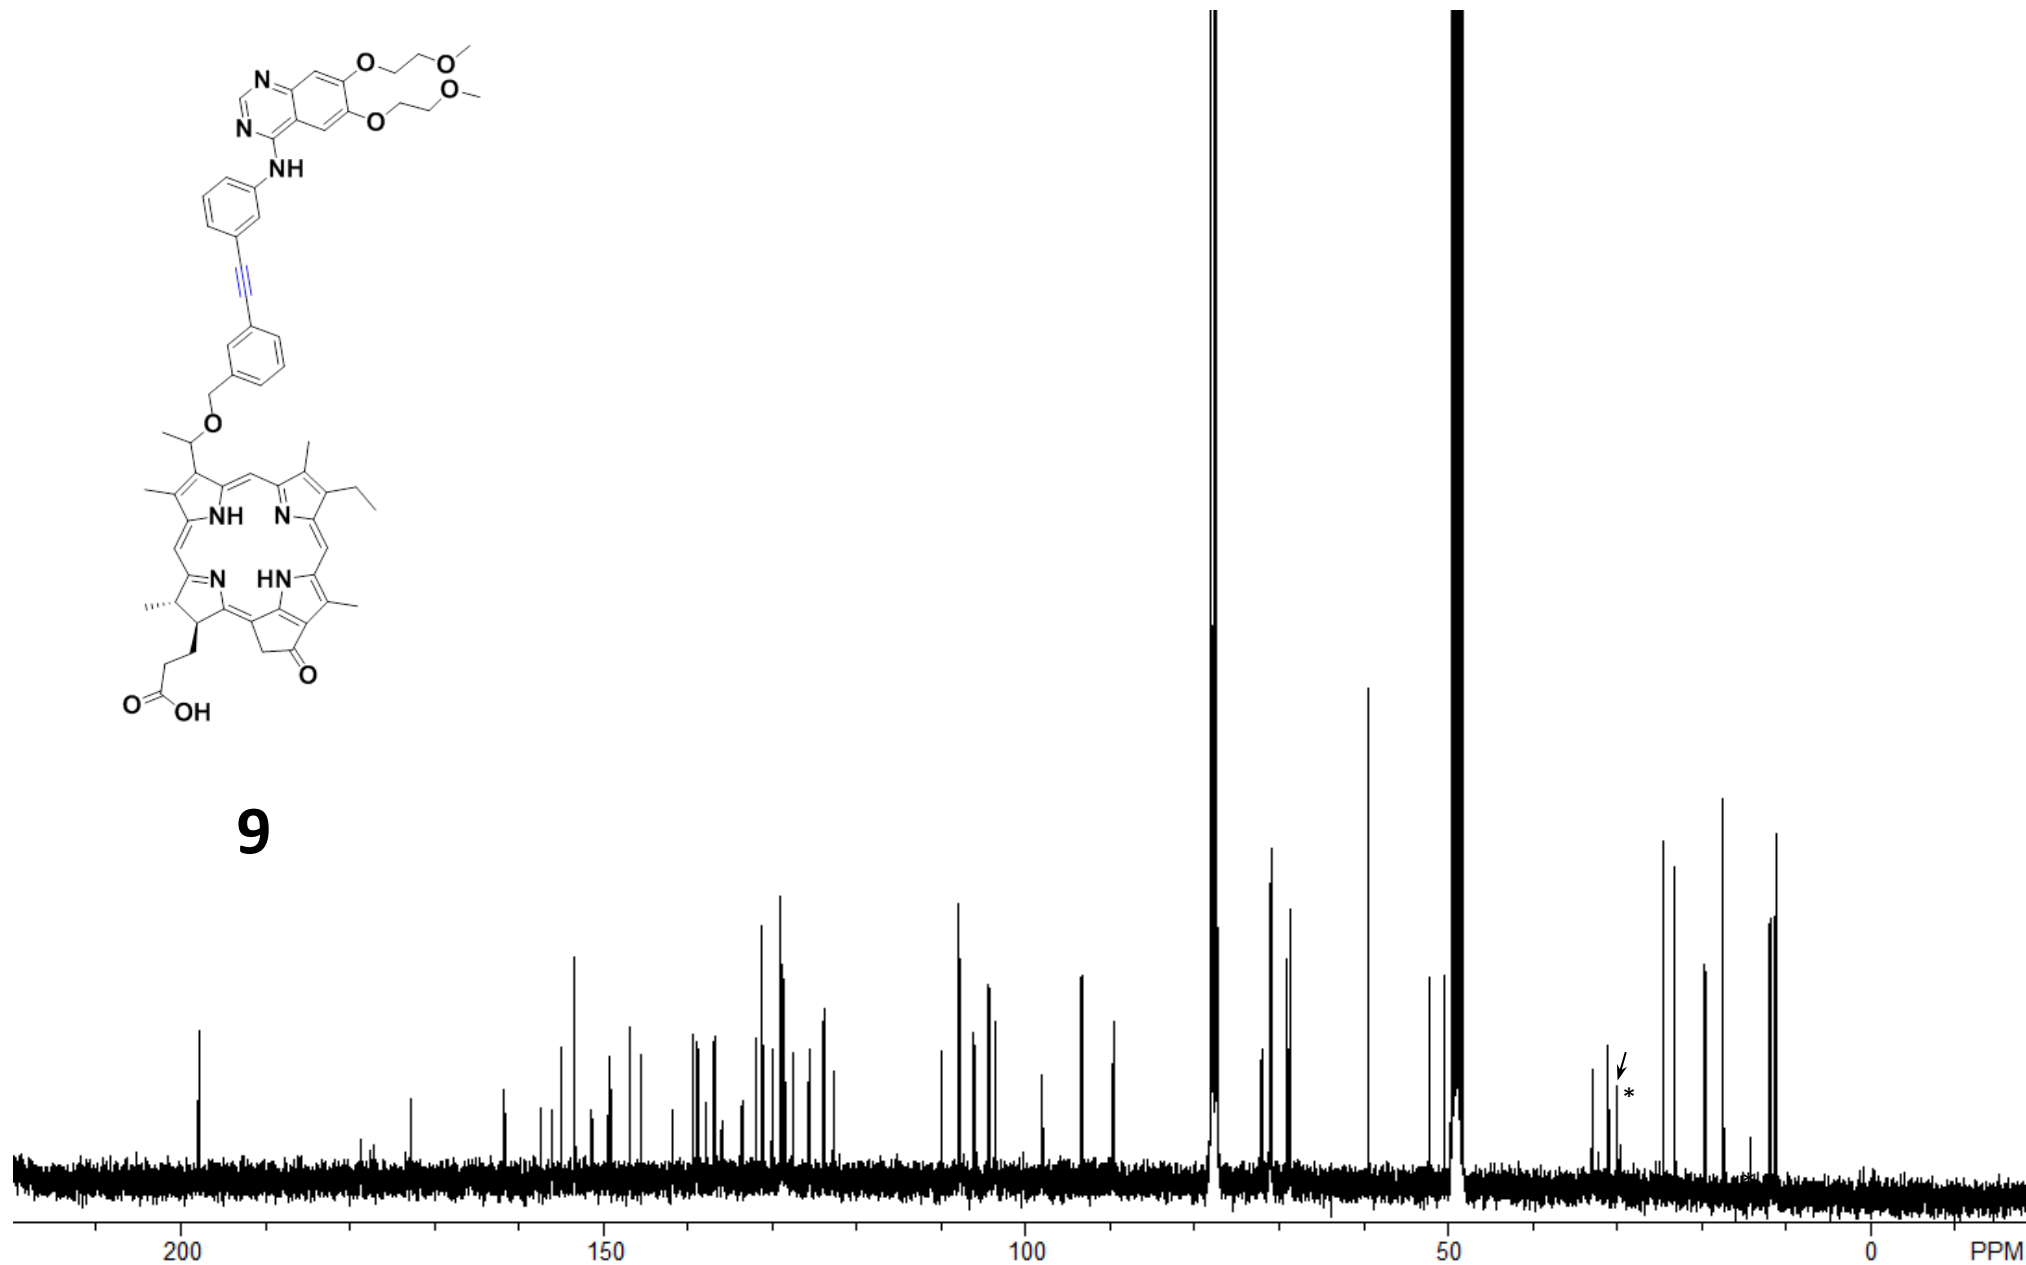

\* Grease impurity

Figure S9:  $^1\text{H-NMR}$  (400 MHz,  $\text{CDCl}_3$ )

S10

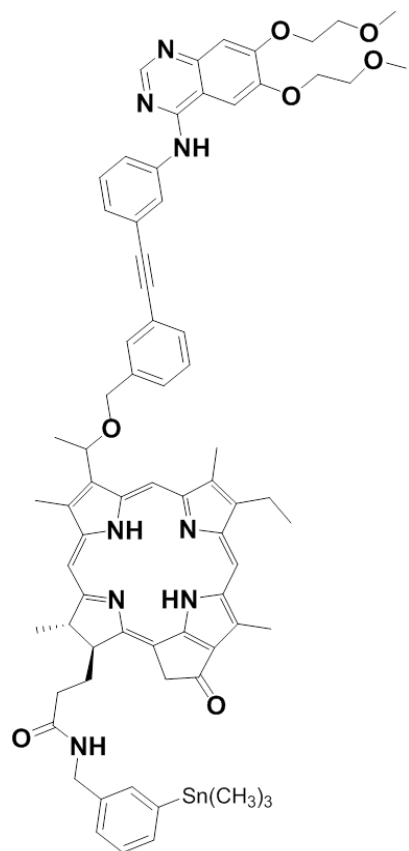

**10**

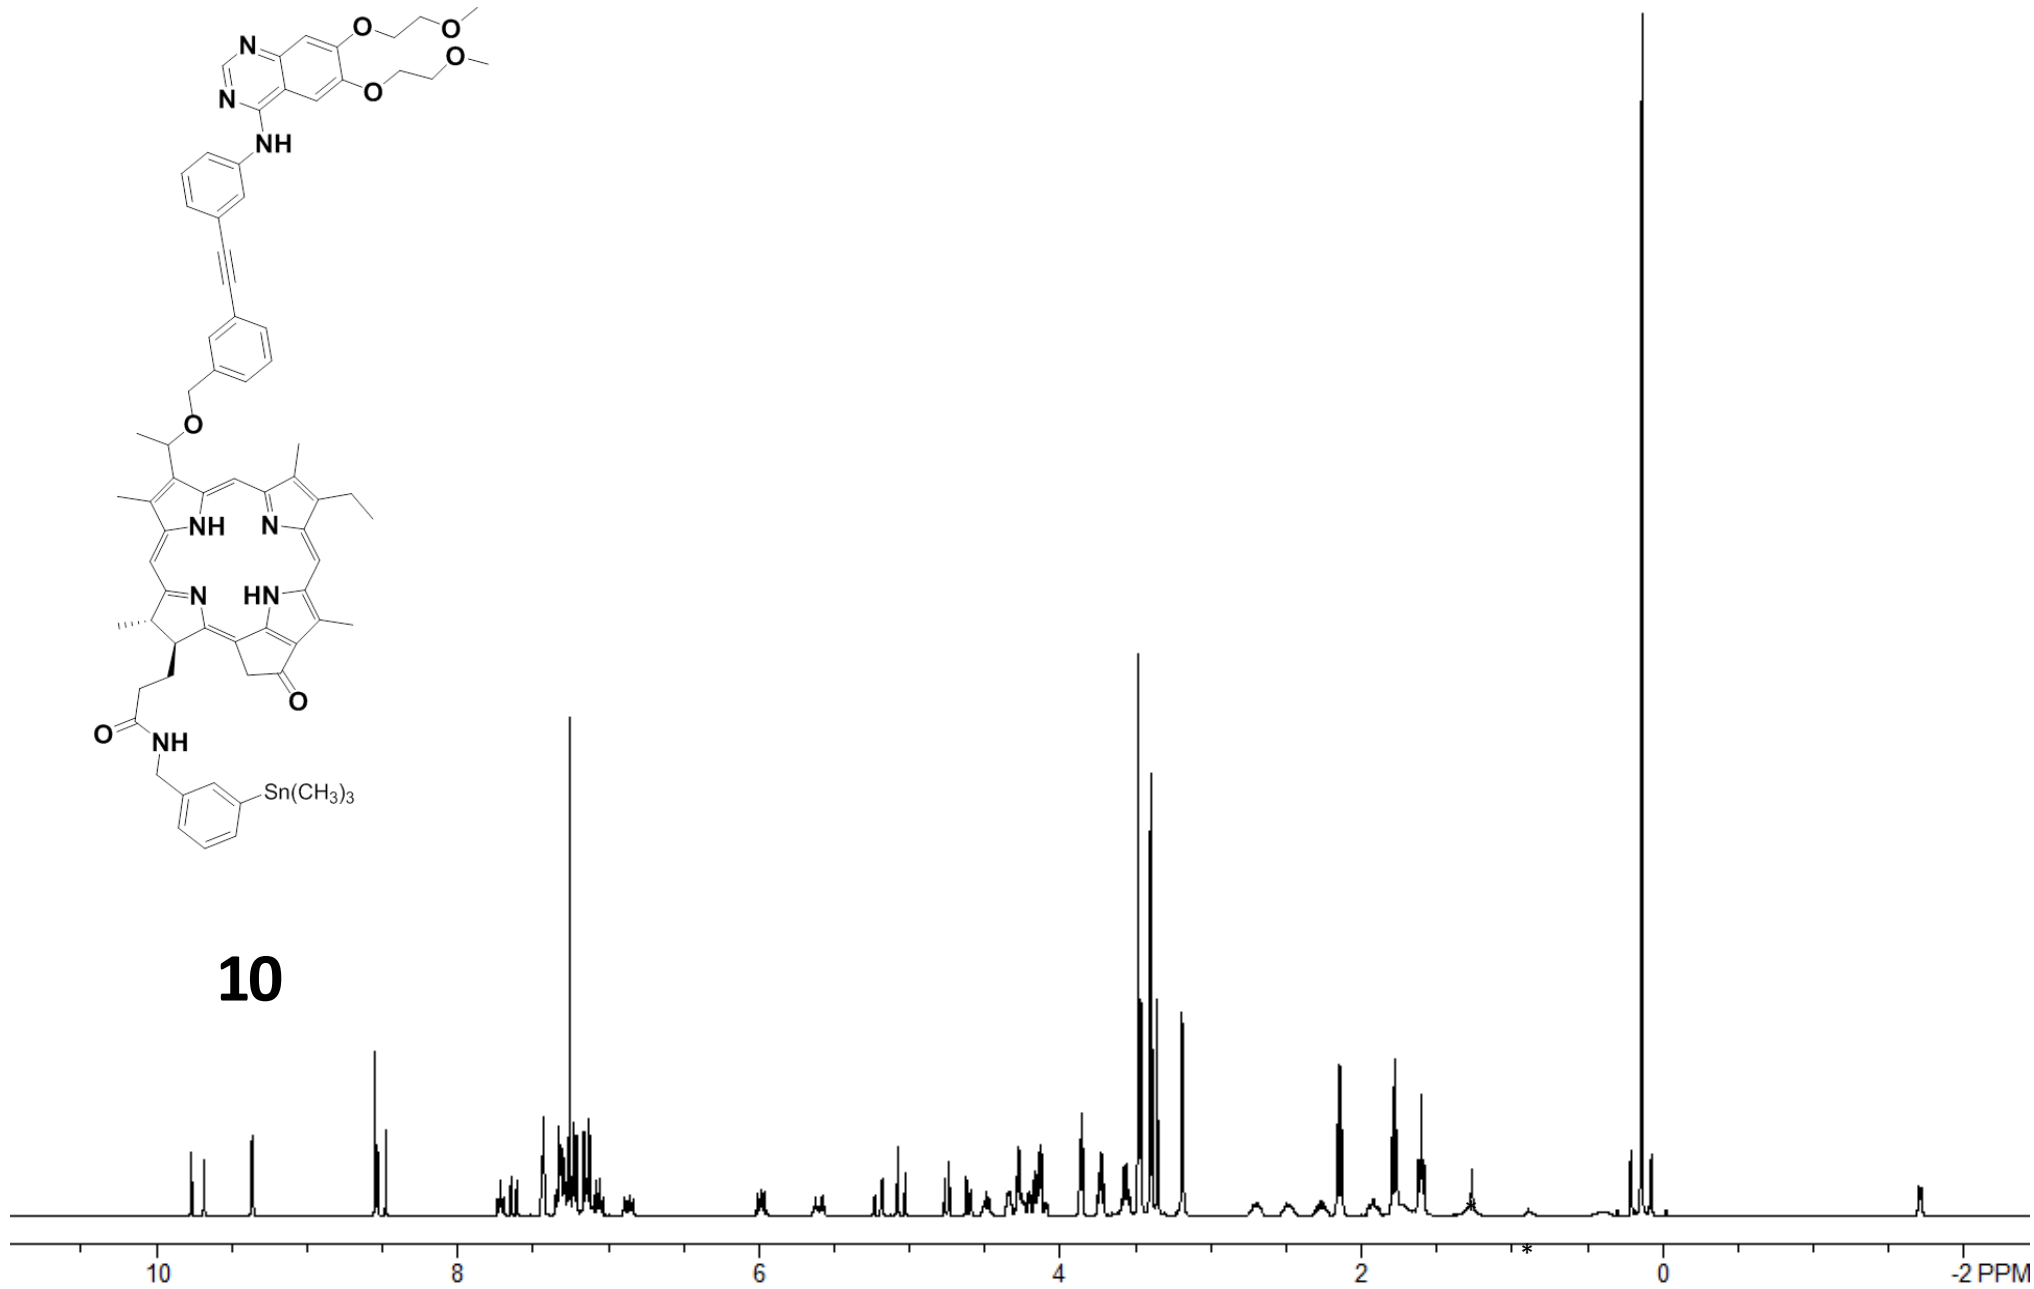

\* Grease impurity

Figure S10:  $^{13}\text{C}$ -NMR (100 MHz,  $\text{CDCl}_3$ )

S11

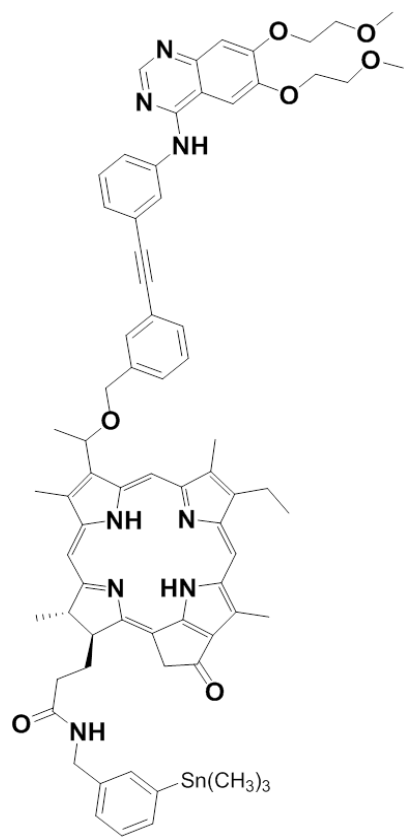

10

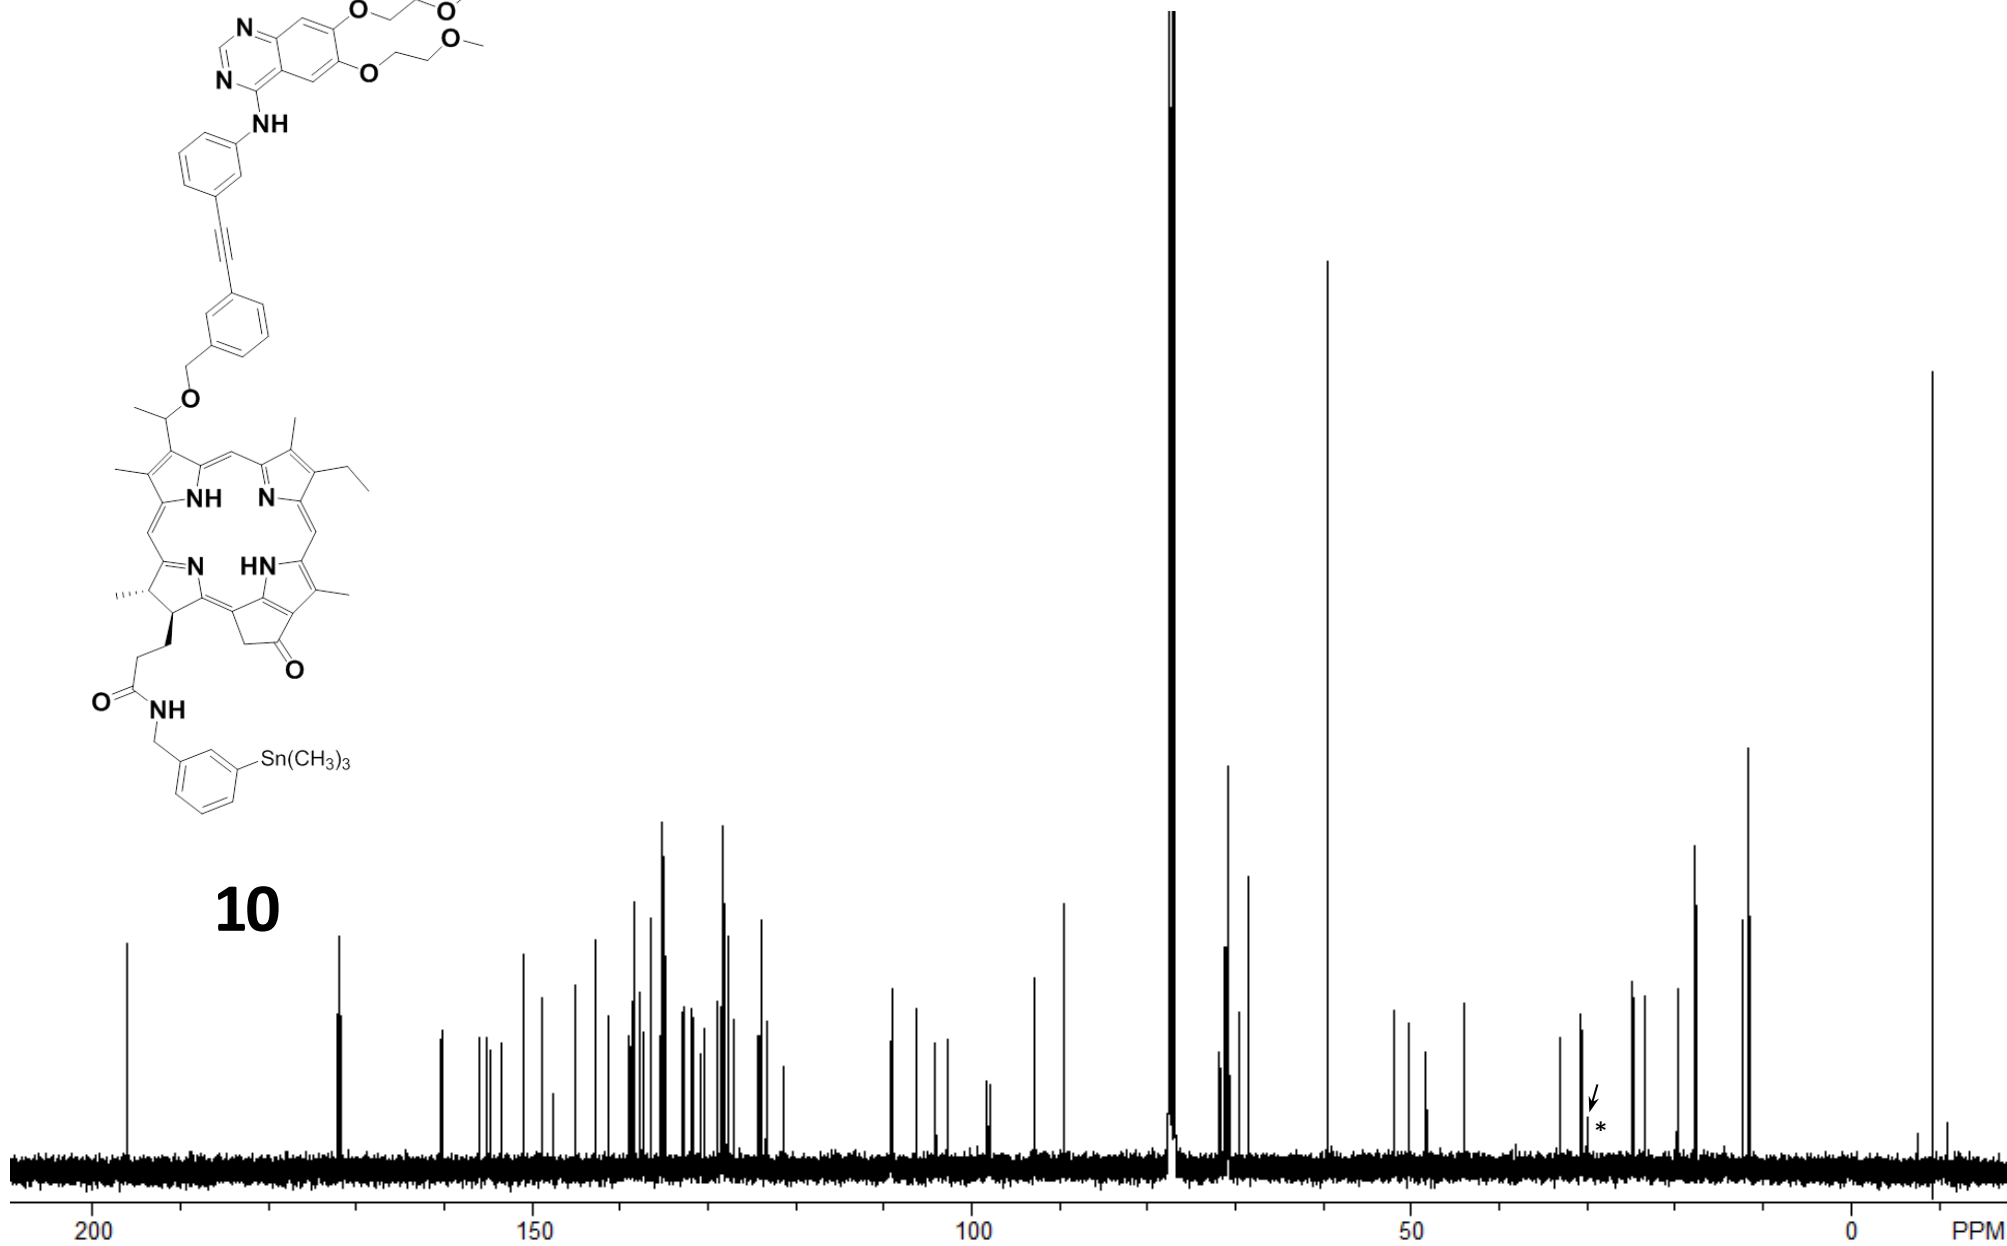

\* Grease impurity

Figure S11:  $^1\text{H-NMR}$  (400 MHz, 80:20  $\text{CDCl}_3/\text{CD}_3\text{OD}$ )

S12

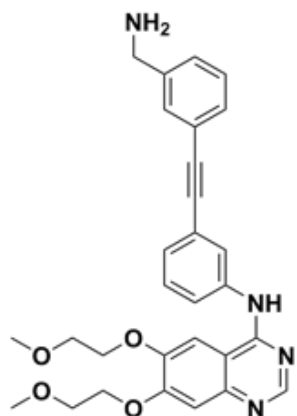

**11**

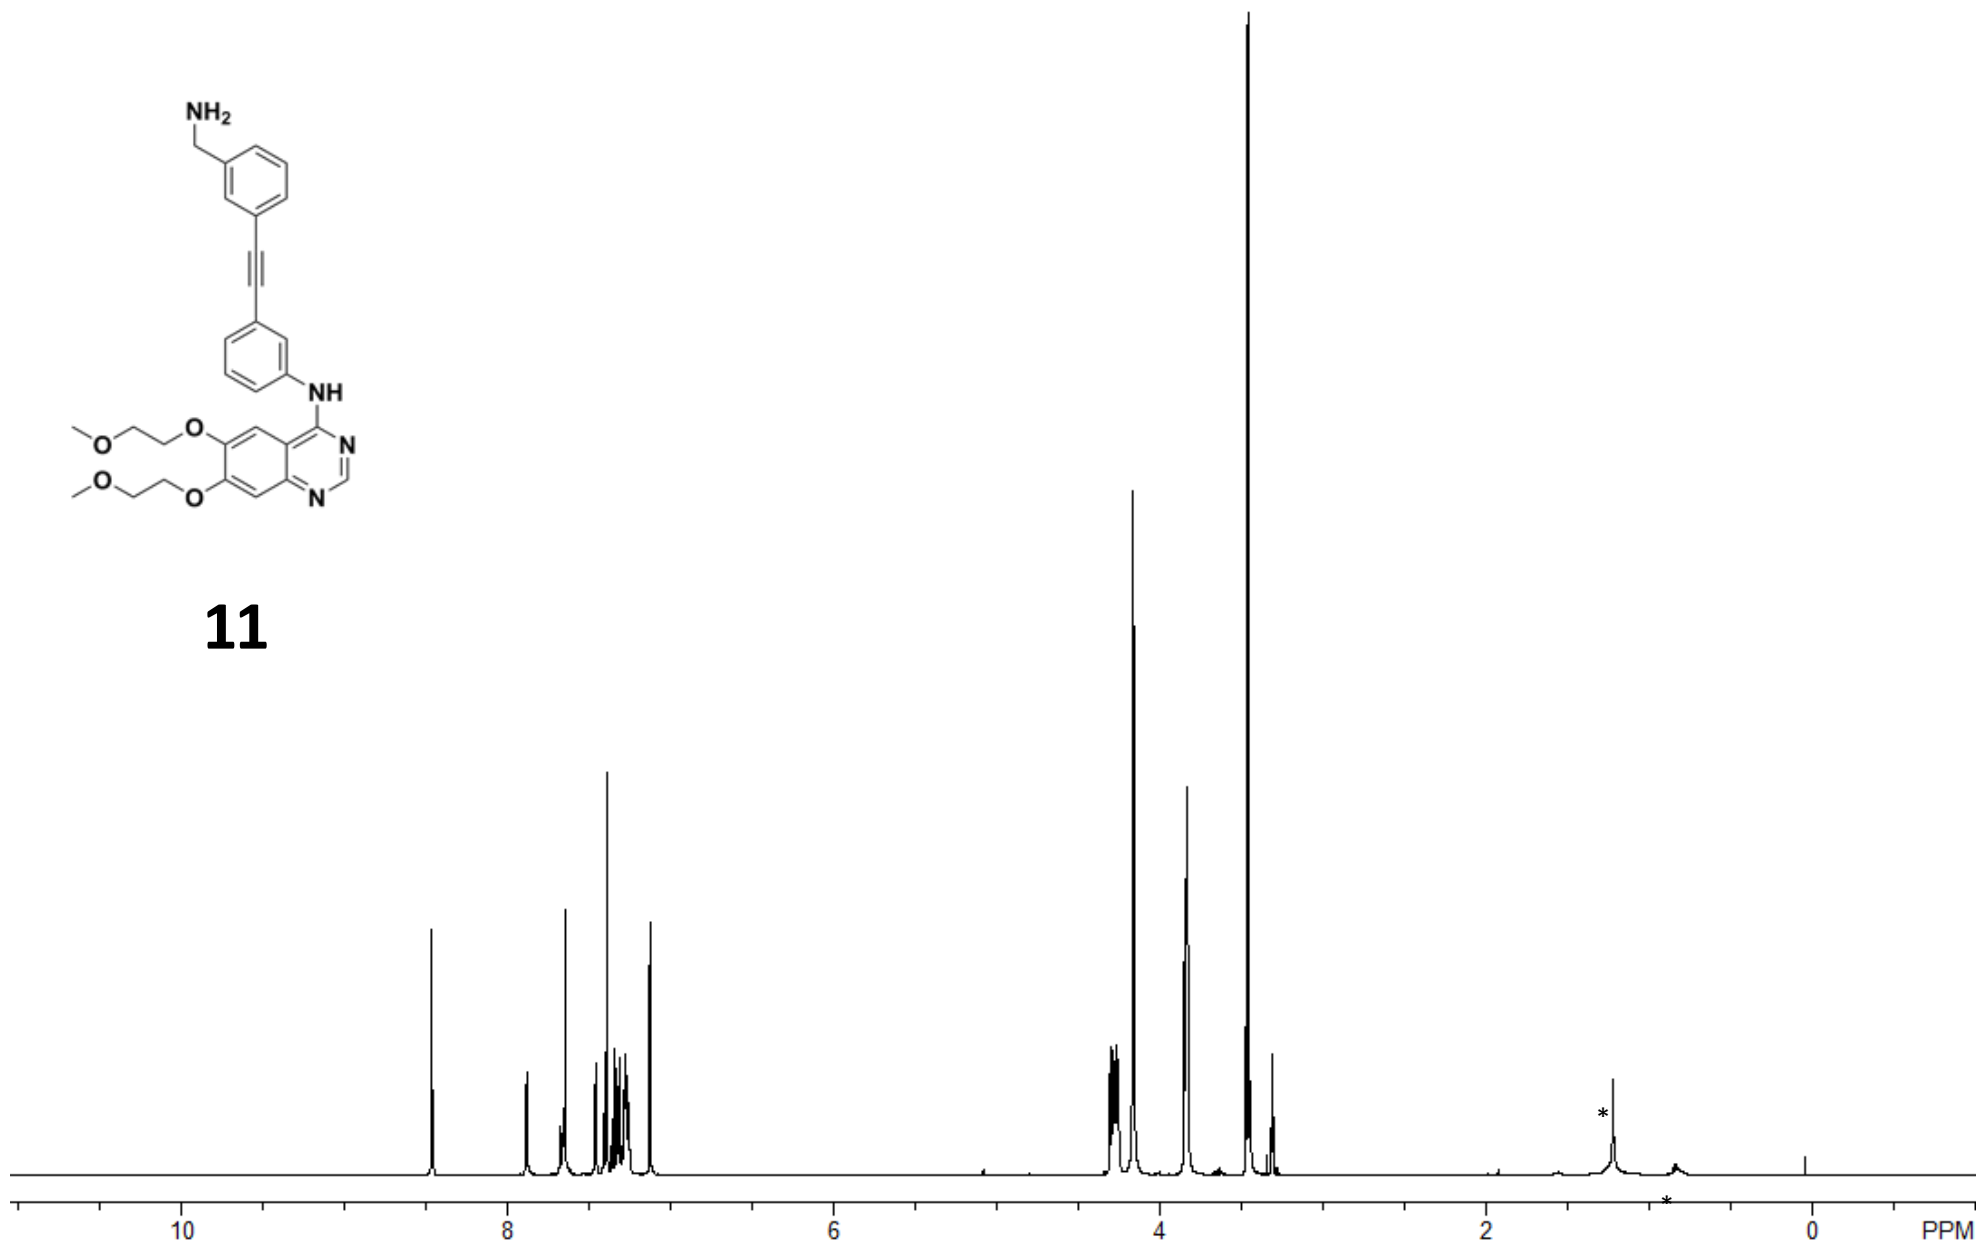

\* Grease impurity

Figure S12:  $^{13}\text{C}$ -NMR (100 MHz, 80:20  $\text{CDCl}_3/\text{CD}_3\text{OD}$ )

S13

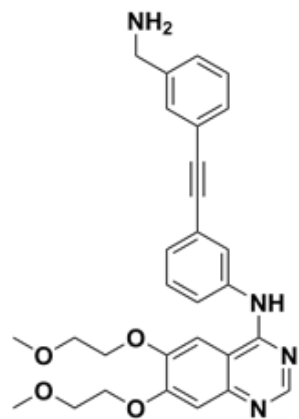

11

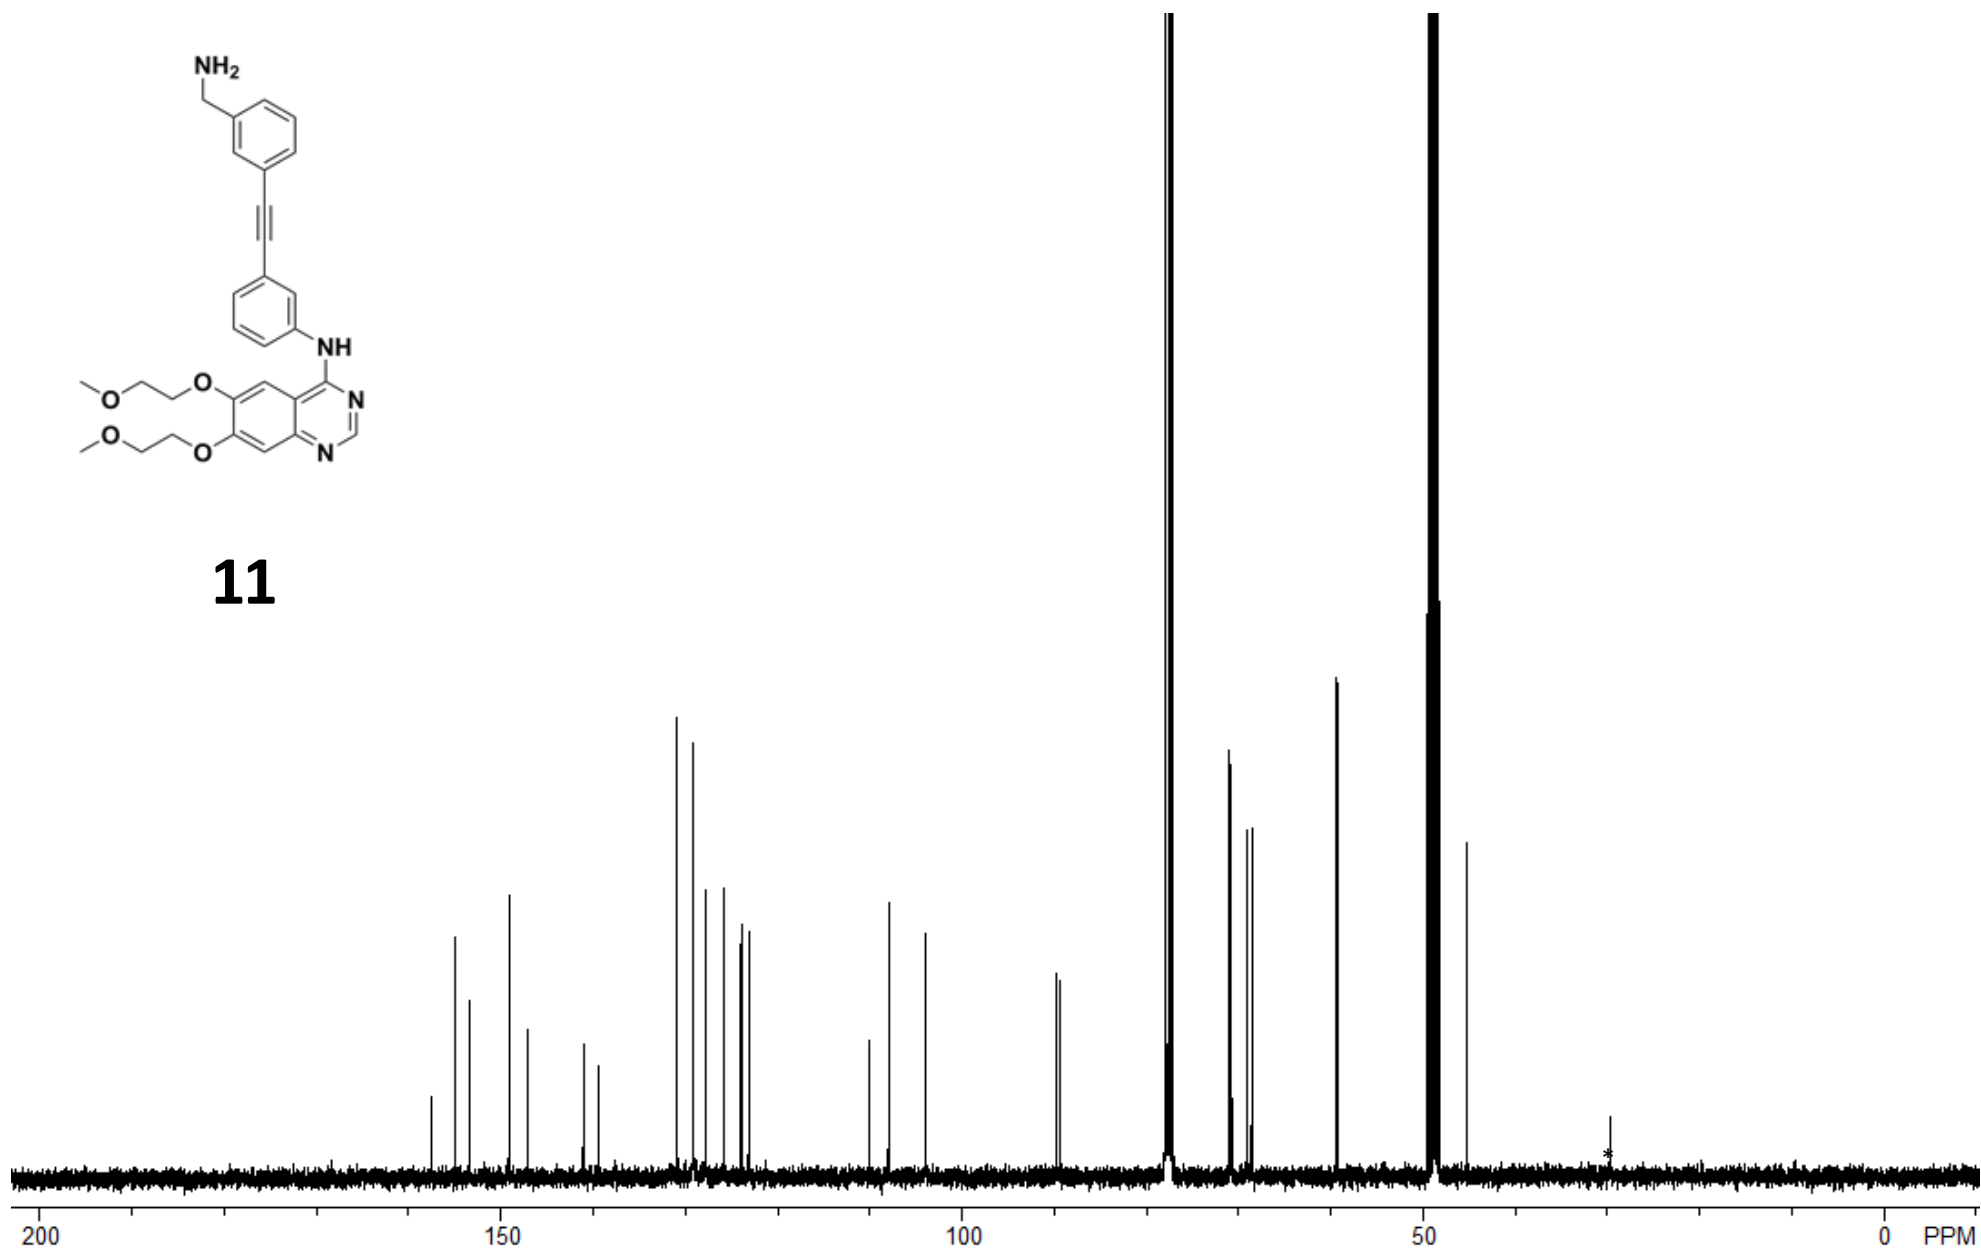

\* Grease impurity

Figure S13:  $^1\text{H-NMR}$  (400 MHz,  $\text{CDCl}_3$ )

S14

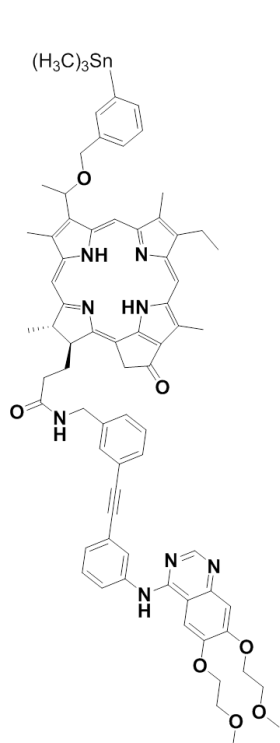

**13**

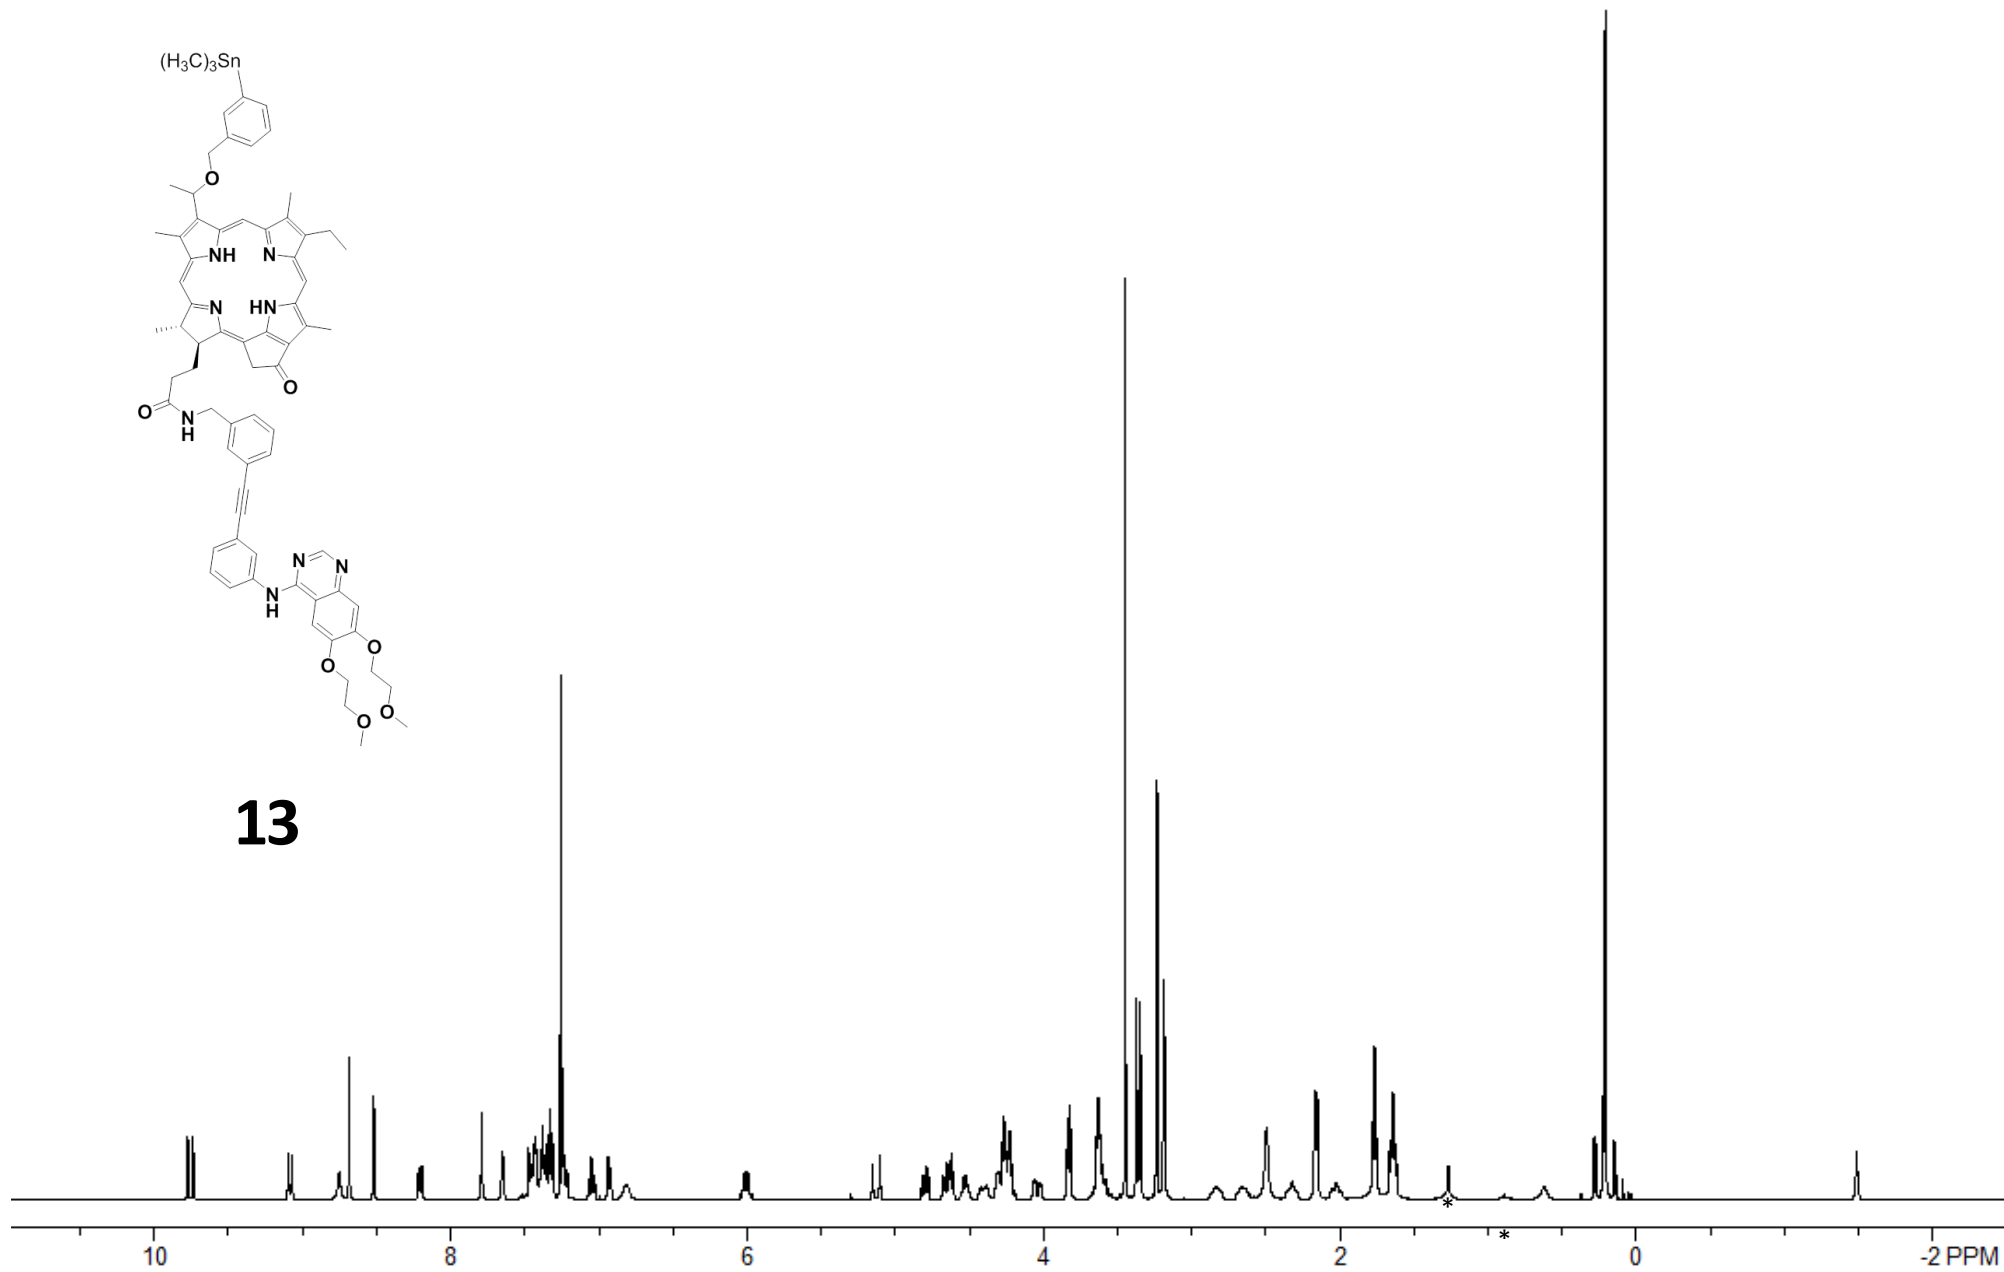

\* Grease impurity

Figure S14:  $^{13}\text{C}$ -NMR (100 MHz,  $\text{CDCl}_3$ )

S15

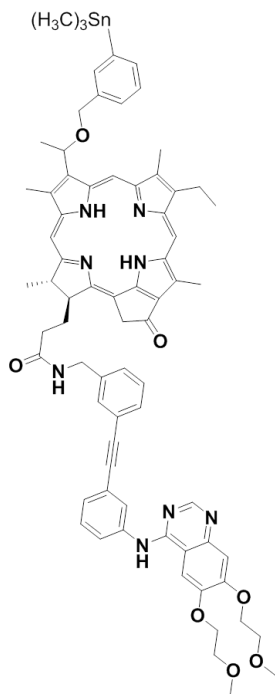

**13**

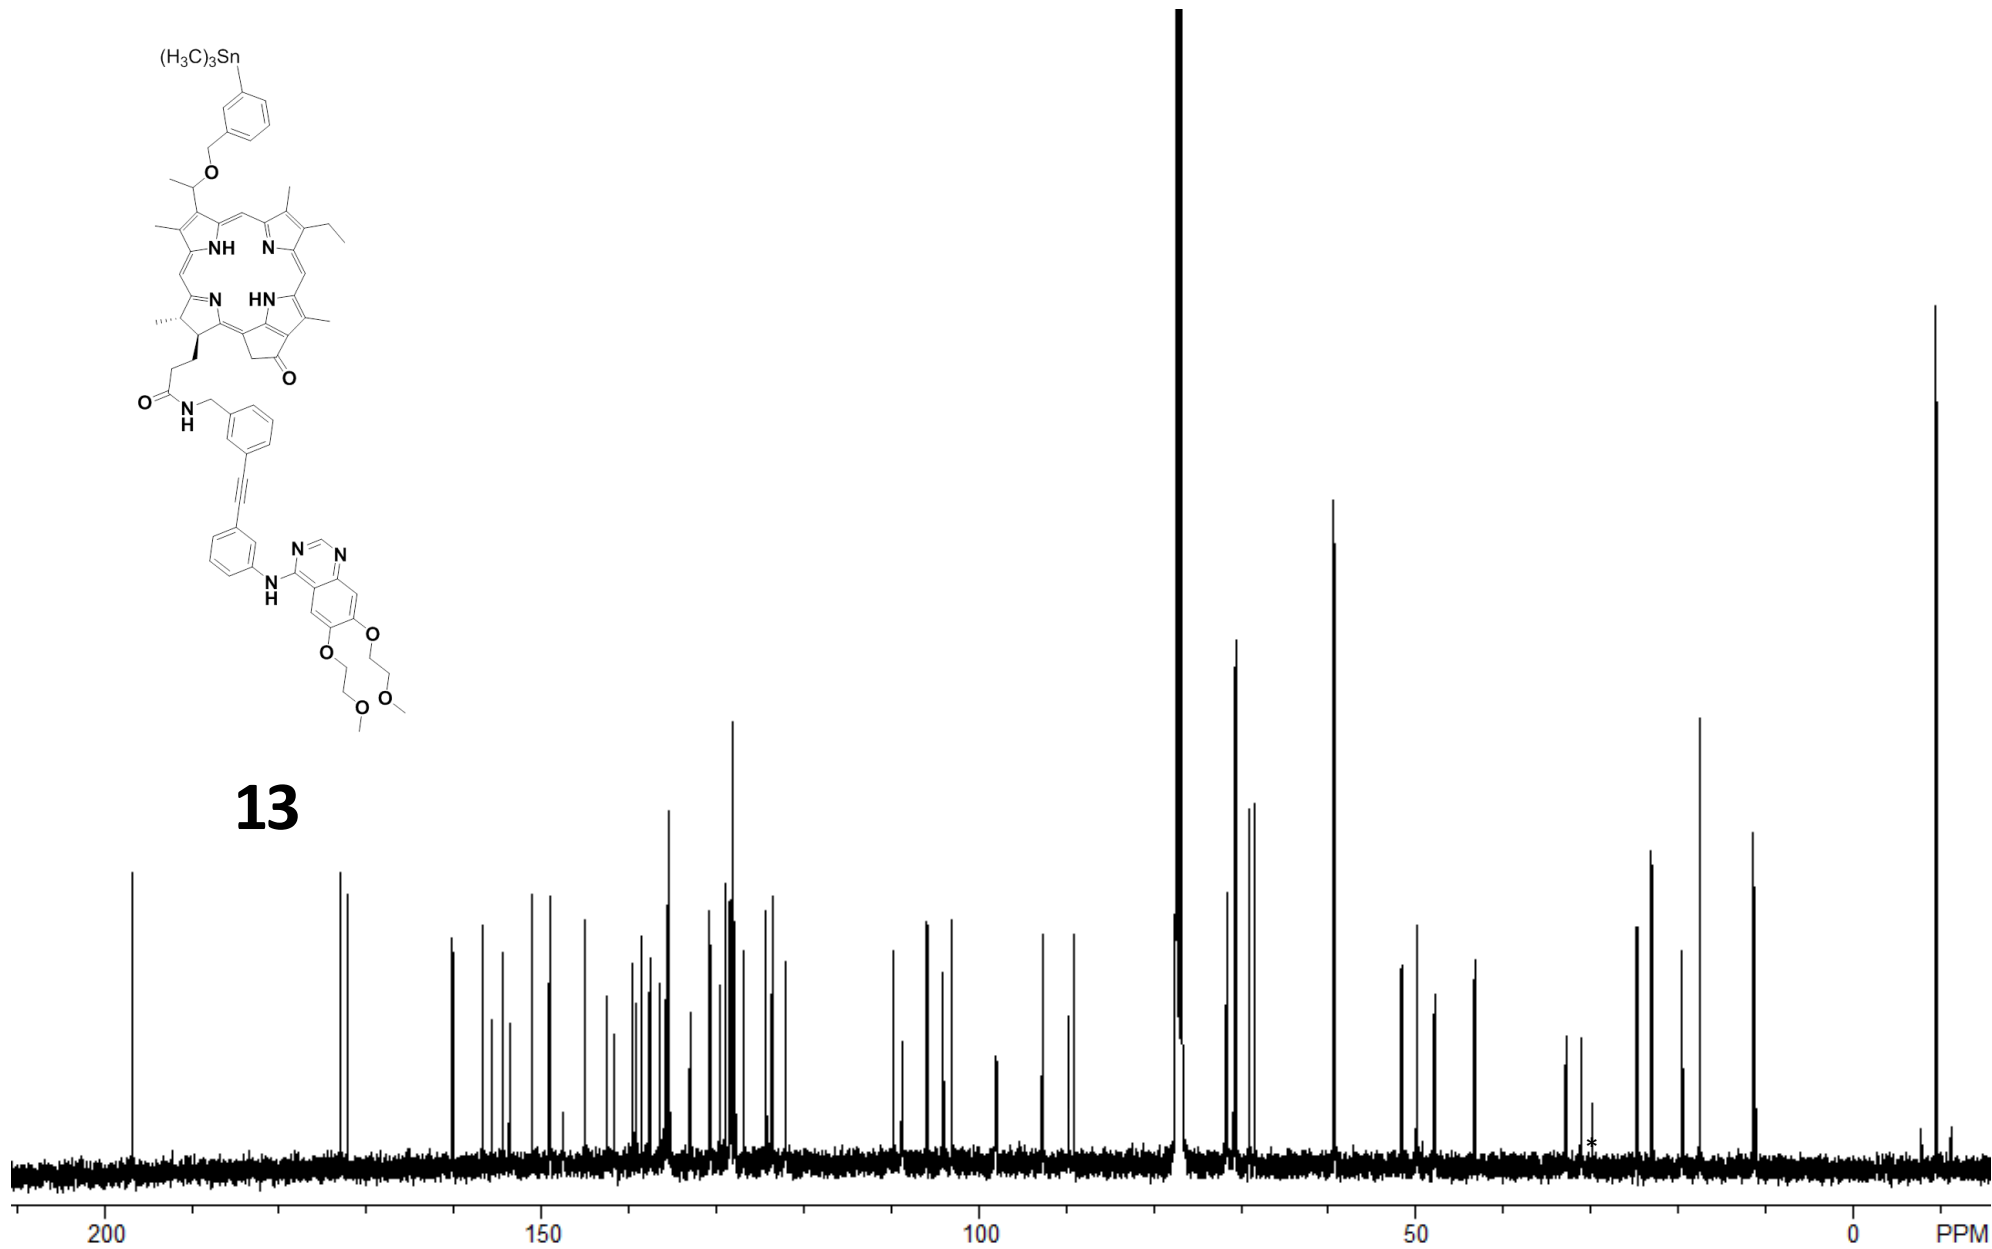

\* Grease impurity

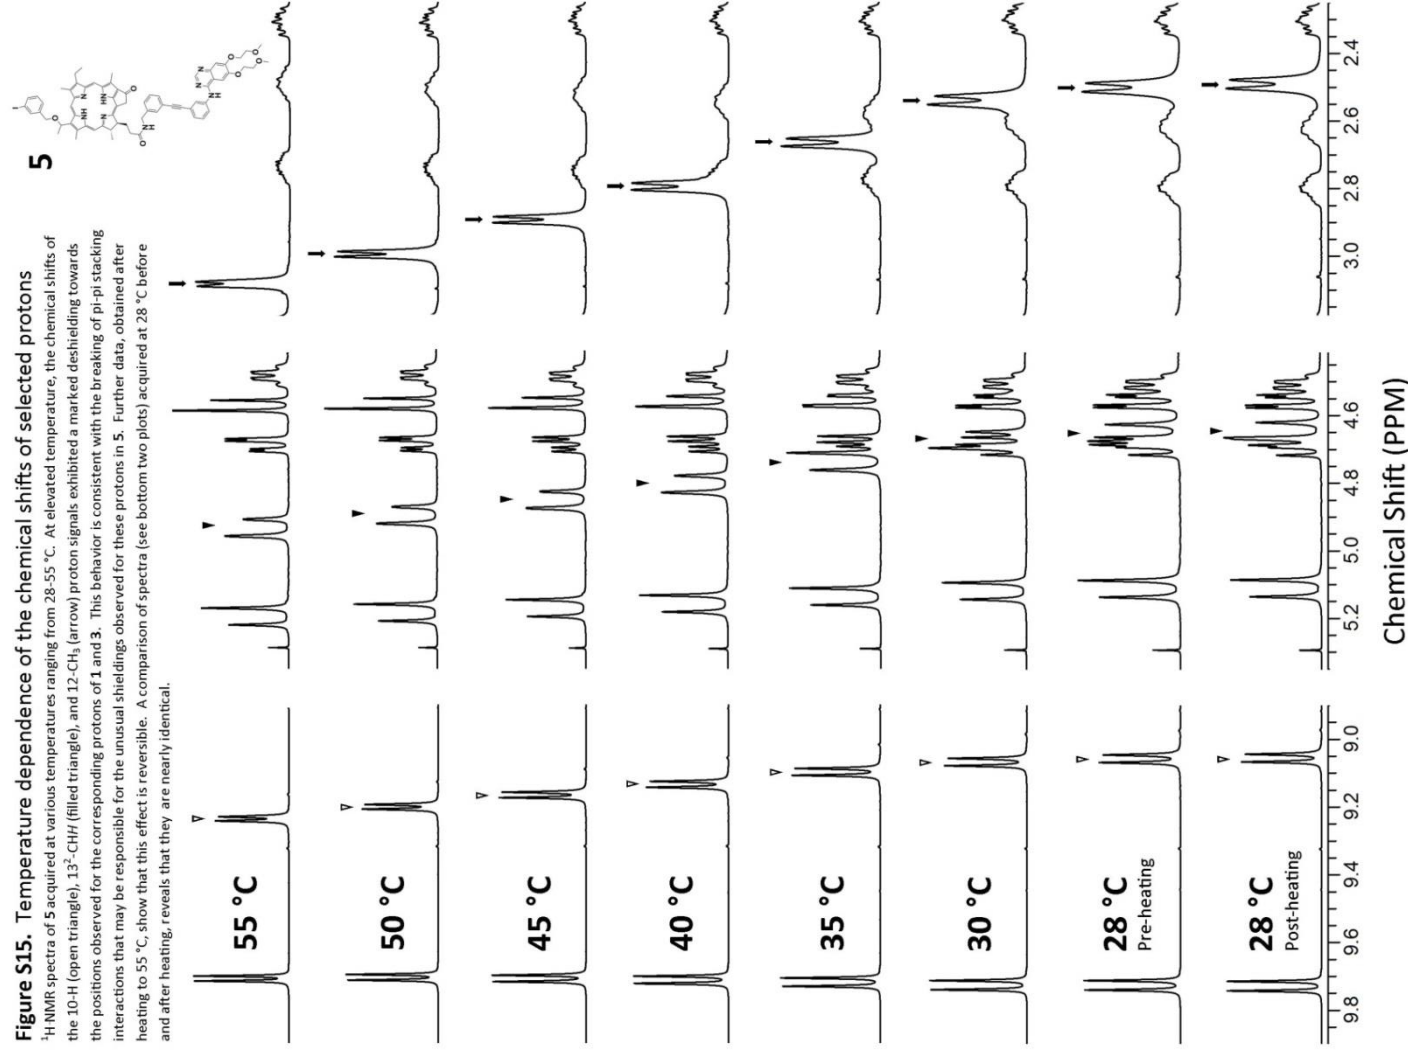



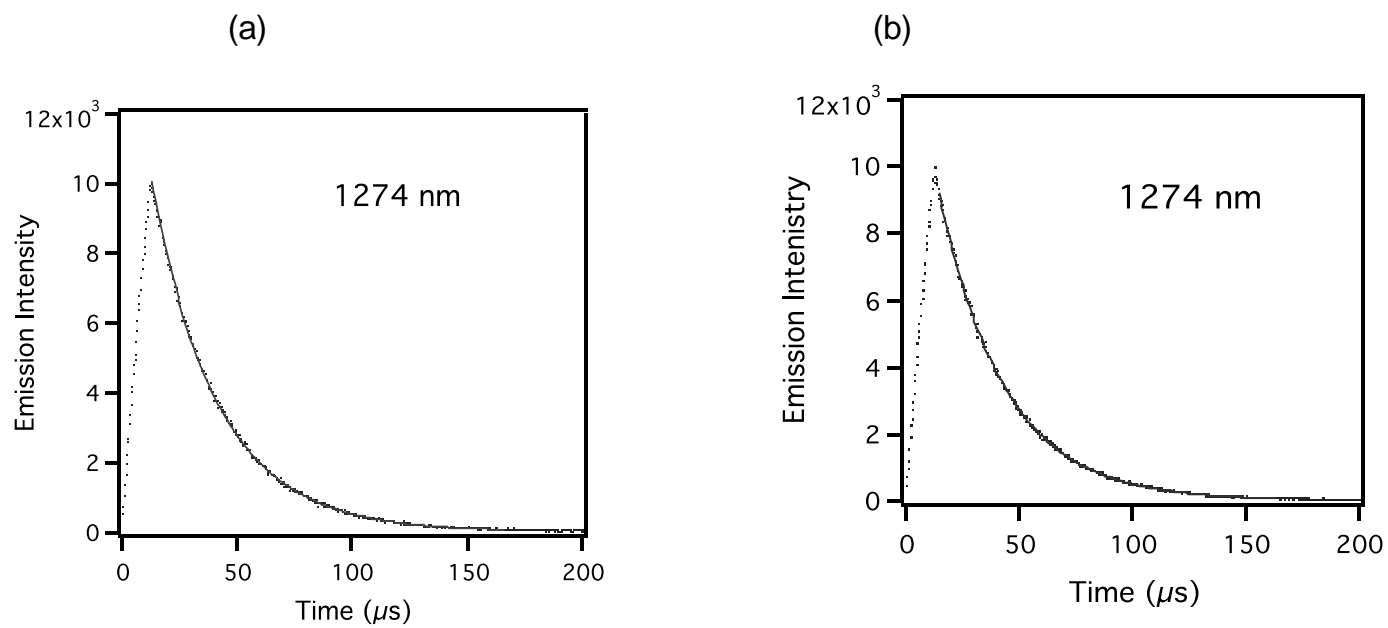

**Figure S16.** Lifetimes of the singlet oxygen in toluene for **3** (a), and **5** (b);  $\lambda_{ex} = 470$  nm.

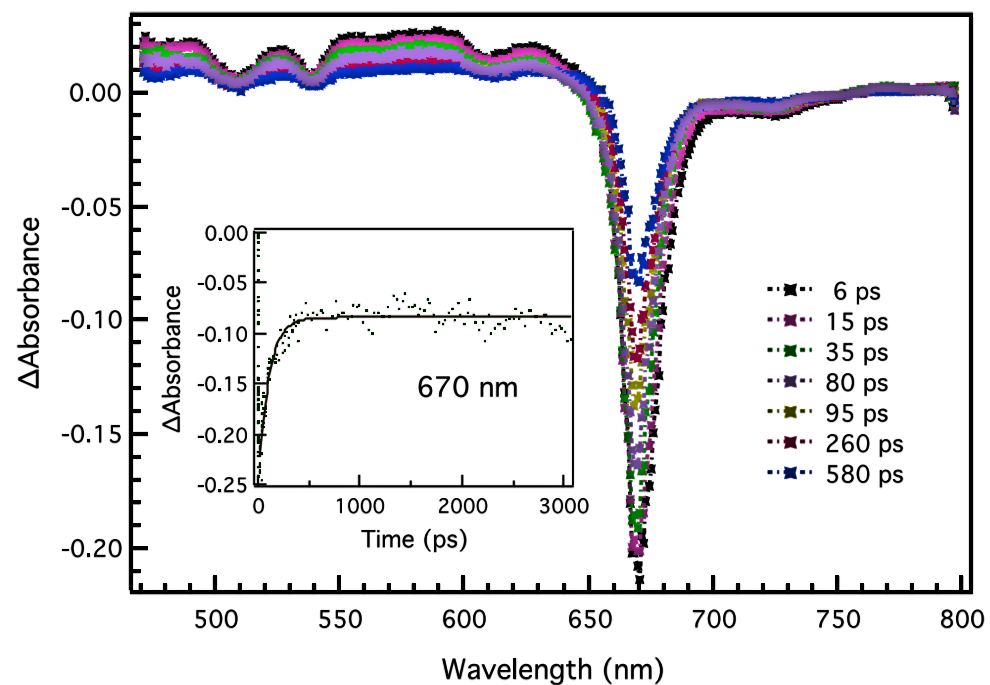

**Figure S17.** Differential absorption spectra obtained upon femtosecond flash photolysis ( $\lambda_{\text{ex}} = 390$  nm) of **3** in deaerated toluene at the indicated time intervals. The inset shows the time profile of the singlet-excited state at 670 nm.

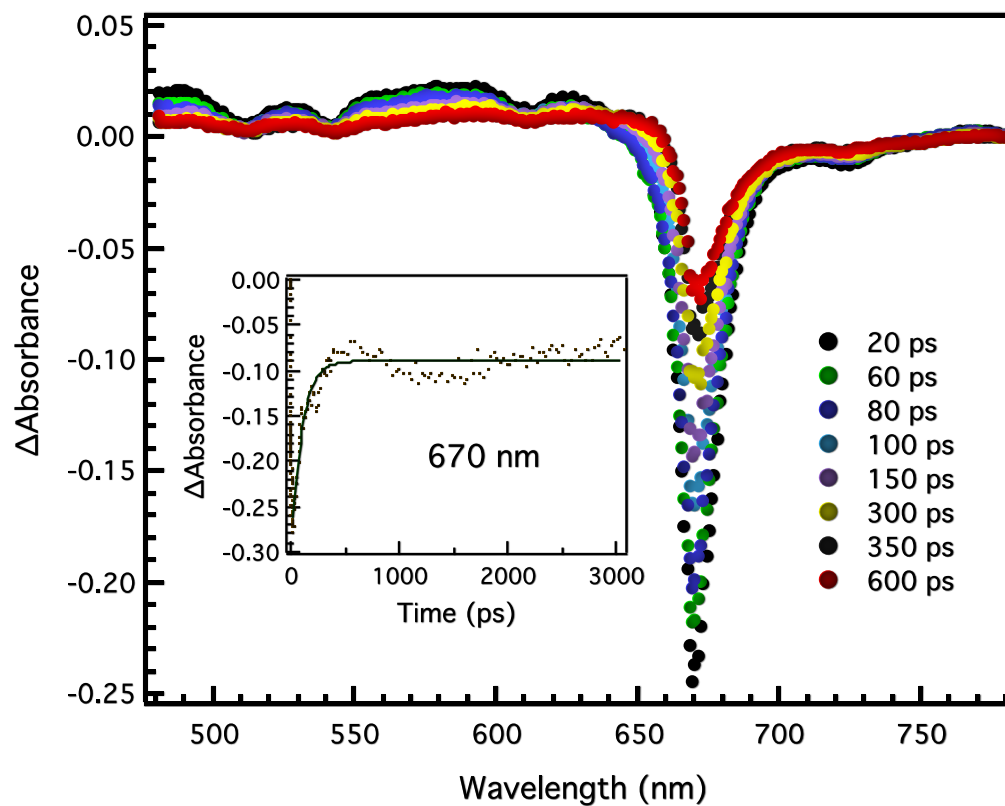

**Figure S18.** Differential absorption spectra obtained upon femtosecond flash photolysis ( $\lambda_{\text{ex}} = 390$  nm) of **5** in deaerated toluene at the indicated time intervals. The inset shows the time profiles of the singlet-excited state at 670 nm.

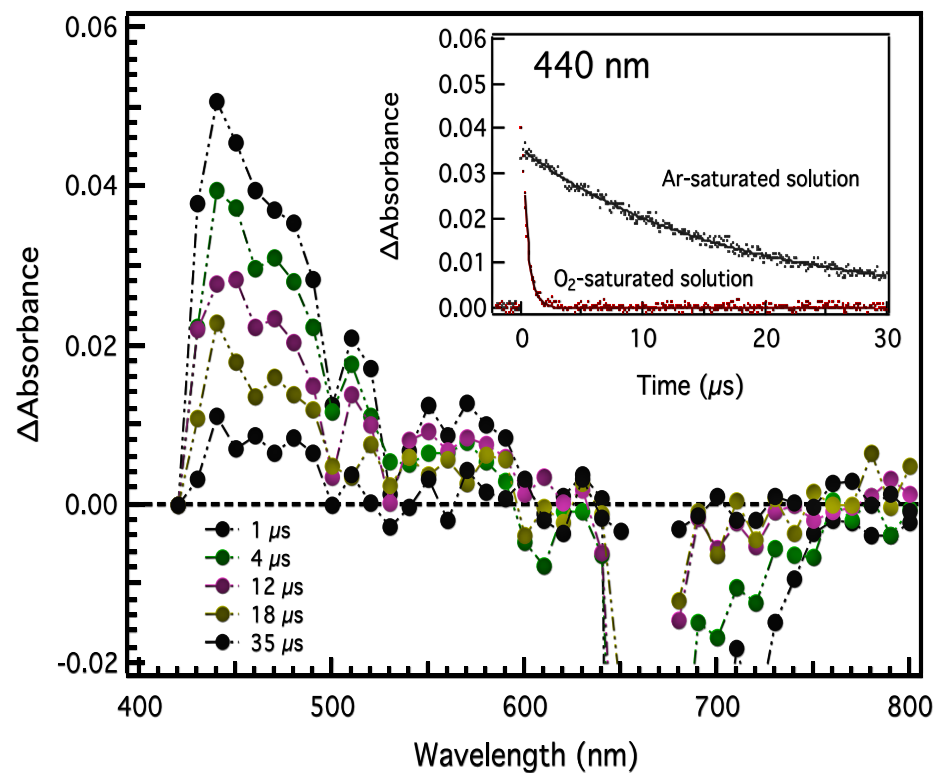

**Figure S19.** Nanosecond transient absorption spectra at the indicated time intervals of PS **1** in Ar-saturated toluene solution. Inset shows the decay profile of the triplet **1** in Ar-saturated and oxygen-saturated solutions.

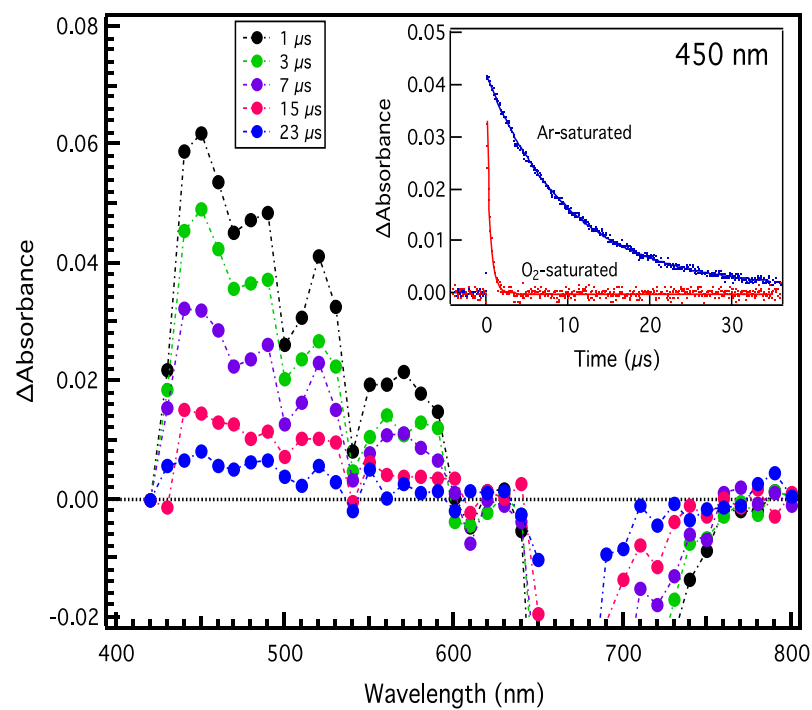

**Figure S20.** Nanosecond transient absorption spectra at the indicated time intervals of the **5** in Ar-saturated toluene solution. Inset shows the decay profile of the triplet state of **5** in Ar-saturated and oxygen-saturated solutions.



|    |                                                                                                                                                                                                                                  |  |  |  |  |  |  |  |  |  |  |  |  |  |  |  |  |  |  |  |  |  |  |  |
|----|----------------------------------------------------------------------------------------------------------------------------------------------------------------------------------------------------------------------------------|--|--|--|--|--|--|--|--|--|--|--|--|--|--|--|--|--|--|--|--|--|--|--|
| 13 | <chem>C[C@@H]([C@@H]/1CCC([NH])=O)C/C=C(N/2)/C(C)=C(C(C)OCC3=CC=CC([Sn](C)(C)C)=C3)C2=C\C4=N/C(CC)=C4C=C\5)=NC1=C(CC6=O)/C7=C6C(C)=C5<br/> N7.COCCOC(C(OCCOC)=C8)=CC(C8=NC=N9)=C9NC%10=CC=CC(C#CC%11=CC(CC)=CC=C%11)=C%10</chem> |  |  |  |  |  |  |  |  |  |  |  |  |  |  |  |  |  |  |  |  |  |  |  |
|    |                                                                                                                                                                                                                                  |  |  |  |  |  |  |  |  |  |  |  |  |  |  |  |  |  |  |  |  |  |  |  |
|    |                                                                                                                                                                                                                                  |  |  |  |  |  |  |  |  |  |  |  |  |  |  |  |  |  |  |  |  |  |  |  |
|    |                                                                                                                                                                                                                                  |  |  |  |  |  |  |  |  |  |  |  |  |  |  |  |  |  |  |  |  |  |  |  |
|    |                                                                                                                                                                                                                                  |  |  |  |  |  |  |  |  |  |  |  |  |  |  |  |  |  |  |  |  |  |  |  |
